1 **Dynamics in coastal RNA viruses and bacteriophages are driven by shifts in the community**  
2 **phylogenetic structure**

3 Julia A. Gustavsen<sup>1†</sup> and Curtis A. Suttle<sup>1,2,3,4\*</sup>

4 <sup>1</sup> Department of Earth, Ocean and Atmospheric Sciences, University of British Columbia,  
5 Vancouver, B.C., Canada

6 <sup>2</sup> Department of Botany, University of British Columbia, Vancouver, B.C., Canada

7 <sup>3</sup> Department of Microbiology & Immunology, University of British Columbia, Vancouver,  
8 B.C., Canada

9 <sup>4</sup> Institute for the Oceans and Fisheries, University of British Columbia, Vancouver, B.C.,  
10 Canada

11 † Present address: Sophia Genetics, Rue du Centre 172, 1025 Saint-Sulpice, V.D.,  
12 Switzerland

13 \*Correspondence: Curtis A. Suttle, Department of Earth, Ocean & Atmospheric Sciences,  
14 The University of British Columbia, 2020 - 2207 Main Mall, Vancouver, B.C., V6T 1Z4,  
15 Canada [suttle@science.ubc.ca](mailto:suttle@science.ubc.ca)

16 keywords: virus / phylogeny / coastal / time series / bacteria / phytoplankton / killing the  
17 winner / seed bank / 18S / 16S / dynamics / quasispecies / *Picornavirales* / *Myoviridae*

18 Section: microbial ecology

19 Running title: Phylogenetic shifts in dominant viral communities

## 20 **Abstract**

21 Marine microbes including viruses are an essential part of the marine ecosystem that forms  
22 the base of the foodweb, and drives biogeochemical cycles. Marine viral communities  
23 display repeatable changes in abundance and community composition throughout time;  
24 however, whether these changes reflect shifts in dominance within evolutionarily related  
25 groups of viruses and their hosts is unexplored. To examine these dynamics, changes in the  
26 composition and phylogenetic makeup of two ecologically important groups of viruses, and  
27 their potential hosts, were sampled every two weeks for 13 months at a coastal site in  
28 British Columbia, Canada. Changes in the taxonomic composition within DNA  
29 bacteriophages related to T4-like viruses and marnavirus-like RNA viruses infecting  
30 eukaryotic phytoplankton, as well as bacteria and eukaryotes, were examined using  
31 amplicon sequencing of gene fragments encoding the major capsid protein (*gp23*), the  
32 RNA-dependent RNA polymerase (*RdRp*) and the 16S and 18S ribosomes, respectively. The  
33 results showed that for both viral marker genes, the dominant groups of phylogenetically-  
34 related viruses shifted over time and contained many transient taxa and few persistent  
35 taxa; yet, different community structures were observed in these different viral  
36 communities. Additionally, with strong lagged correlations between viral richness and  
37 community similarity of putative hosts, the results imply that viruses influence the  
38 composition of the host communities.

## 39 **Importance**

40 Using high-throughput sequencing of coastal seawater collected every two weeks for one  
41 year, the dynamics of two groups of ecologically important groups of viruses were  
42 described in the context of their putative hosts and the environment. There was a large  
43 diversity of viruses and putative hosts in this study, and groups of phylogenetically-related  
44 viruses showed temporal dynamics in dominance. Examining the richness of viruses by  
45 phylogenetic groups showed different dynamics of either boom-bust or continued  
46 persistence. At the OTU-level, some members of these related groups persisted throughout  
47 time, while others were more ephemeral. These findings were put in context of potential  
48 quasispecies behaviour, and the dynamics of putative hosts. These results showed that  
49 temporal dynamics of viral communities have a phylogenetic signal which is important for  
50 understanding the ecology of these viruses since it elucidated one of the drivers of the  
51 community structure.

## 52 **Introduction**

53 Understanding diversity, its maintenance, and its drivers is a continued theme in ecology.  
54 In microbial systems there has been extensive exploration and discussion about the  
55 mechanisms responsible for the observed high diversity (1). Many studies on microbial  
56 diversity and dynamics come from the marine milieu, where it has been argued that  
57 community composition is driven by environmental factors (2–5). Against this backdrop  
58 are viruses, which are obligate parasites that are the most abundant biological entities in  
59 the world's oceans, and account for much of its diversity (6).

60 This high viral diversity arises since viruses have many different lifestyles (7),  
61 morphologies (8), and infection strategies. Some viruses infect specific strains or species of  
62 hosts, whereas others have broad host-ranges (9). As well, some groups of viruses show  
63 particularly high genetic diversity because of their low fidelity of replication (10), while  
64 others have high rates of horizontal gene transfer (11). The role of viruses as obligate  
65 pathogens, often with high host specificity, implies that they are important drivers of host  
66 composition and diversity (12); yet, our understanding of their roles as drivers of marine  
67 microbial diversity remains relatively unexplored.

68 Marine viruses have repeatable seasonal dynamics as revealed by measures of abundance,  
69 infectious units, and taxonomic composition. Some seasonal studies in coastal waters  
70 report that viral abundances are higher in summer than in winter (13, 14), while other  
71 multi-year time series data show that viral production and viral abundances are highest in  
72 early spring and summer (15, 16). Moreover, viral dynamics can be associated with  
73 putative hosts (16) and specific subsets of the overall coastal viral communities can show  
74 seasonal community composition dynamics (17, 18). As well, viruses infecting  
75 cyanobacteria show temporal dynamics (19, 20), with communities from the same season  
76 resembling each other more than communities sampled in the same year (21, 22), and  
77 communities being more stable in winter than in the summer and spring (23).

78 Viruses affect community composition in laboratory studies by reducing the abundance of  
79 the dominant host, thereby allowing others to grow up (24–26); thus, viruses promote  
80 diversity among hosts (even at the strain level) and can be responsible for large shifts in  
81 the dominant species in bacterial populations (12, 27). These dynamics have been termed

82 "Killing the Winner" (KtW), a model in which the most actively growing hosts are killed by  
83 viruses and replaced by other strains or species (28, 29) and that co-evolution allows these  
84 dynamics to continue over time (30). There is evidence of KtW dynamics in field studies, as  
85 illustrated by a study on a solar saltern, in which coarsely-defined bacterial and viral taxa  
86 (akin to genus level grouping) were relatively constant over time, but showed KtW  
87 dynamics at a finer taxonomic scale (31). Common members of the myoviral community  
88 showed greater microdiversity over time and correlations to hosts were stronger when  
89 microdiversity within OTUs was examined in a time series in coastal California to revealing  
90 potential strain-specific effects of viruses on hosts (32). Using complete viral metagenomes  
91 recovered from a freshwater lake, Arkhipova *et al* (33) examined the dynamics of viruses  
92 over a year and found peaks in viral relative abundance before, during and after peaks in  
93 host abundance. Thus there can be interactions that do not follow the Killing the Winner  
94 model and more studies illuminating these interactions are needed as, so far, few  
95 environmental studies have examined potential Killing the Winner dynamics since few  
96 have compared hosts and viruses (34).

97 Examining the temporal dynamics of marine viruses and their hosts has yielded insights  
98 about the ecology of these viruses, yet little attention has been paid to the phylogenetic  
99 relationships within these communities and how they are shaped. An exception is a study  
100 by Goldsmith *et al* (35), near Bermuda, where the phylogenetic makeup of related groups  
101 of viruses over time and depth was found to be highly uneven and variable. There were  
102 differences between fall and winter attributable to stratification, with much of the  
103 variability due to one phylogenetic group of cyanophages (35). In coastal California, groups  
104 of cyanophages belonging to different phylogenetic clades shifted in their relative

105 dominance over time (23). Knowing more about the phylogenetic diversity of the viral  
106 communities will allow us to better interpret these temporal dynamics.

107 Phylogenetic relatedness can be correlated to ecological relatedness in plants and animals  
108 (36, 37) and microbes have shown phylogenetic patterning in distribution and abundance  
109 (38, 39), yet little is known about these patterns in viral communities. To examine these  
110 phylogenetic patterns over time, the following hypotheses were tested: First, it was  
111 hypothesized that phylogenetic patterns in abundance would be detected in the viral  
112 communities, as has been found in putative host communities, since viruses can be driving  
113 Killing the Winner dynamics (28) or be responding to their hosts (33, 40). Second, the  
114 structure of viral communities has been purported to follow a "seed bank" distribution,  
115 where there are many more rare viral operational taxonomic units (OTUs) than abundant  
116 ones (35, 41); therefore, the ranking within phylogenetically-related viral OTUs could also  
117 follow this pattern over time. Examining the temporal relationship between phylogeny and  
118 relative abundance will reveal if genetic relatedness influences dominance in viral and,  
119 potentially, in host communities. Uncovering the alpha diversity over time in communities  
120 and how it relates to other communities and to the environment will illuminate the drivers  
121 of community structure and diversity.

122 To test these hypotheses, the temporal dynamics of the phylogenetic make-up of two  
123 ecologically important groups of marine viruses and their potential hosts were followed in  
124 samples taken every two weeks over thirteen months, using amplified marker genes and  
125 high-throughput sequencing. The community similarities, richness, phylogenetic diversity,  
126 and the relative abundance of phylogenetically-related groups of OTUs were examined over

127 time in viral and putative host communities. Two groups of viruses were selected and  
128 examined because they have shown evidence of continued production in coastal waters  
129 and high diversity of viral genotypes in this environment which would be helpful in the  
130 phylogenetic patterns related to community dynamics and their diversity over time. The  
131 first group was T4-like viruses, DNA viruses that infect bacteria, including cyanobacteria.  
132 The amplification target used was *gp23*, the gene encoding the capsid (42). The second  
133 group of viruses were marnavirus-like viruses (MLVs), marine RNA viruses in the order  
134 *Picornavirales* that infect eukaryotic phytoplankton and possibly heterotrophic protists;  
135 they were targeted by amplifying part of the RNA dependent RNA polymerase (*RdRp*) gene  
136 (43). These viruses infect ecologically important phytoplankton, such as diatoms belonging  
137 to the genera *Rhizosolenia*, *Chaetoceros*, and the toxic bloom-forming raphidophyte  
138 *Heterosigma akashiwo* (44), and have been shown continued production and high diversity  
139 in oceanic communities on the west coast of North America (43, 45–47), in the North  
140 Pacific (48), in Antarctic waters (49) and in the Baltic Sea (50), and in freshwater lakes  
141 (51). Furthermore, when examined along a salinity gradient there was little overlap  
142 between the communities recovered and man unique viral OTUs recovered per site from  
143 six different sites (52). The choice of these two groups also has the advantage of  
144 encompassing groups from both DNA and RNA viruses. The dynamics of putative hosts  
145 were examined by sequencing amplified marker genes for eukaryotes (18S rRNA gene) and  
146 bacteria (16S rRNA gene). This contribution demonstrates that temporal changes in the  
147 phylogenetic make-up of viruses infecting bacteria and eukaryotic algae are related to  
148 environmental changes and to seasonal fluctuations in the communities of potential hosts.

## 149 **Materials and methods**

### 150 **Sample collection**

151 Seawater samples were collected from Jericho Pier (49° 16'36.73N, 123° 12'05.41W) in  
152 British Columbia, Canada. Jericho Pier (JP) is adjacent to the shoreline, in a well-mixed  
153 location with mixed semi-diurnal tides, and significant freshwater influence from the  
154 Fraser River. To get a representative sample of water and enough material for viral  
155 extraction, 60L of water was pumped from the 1-m depth every two weeks at the daytime  
156 high tide between June 2010 and July 2011 (33 samples). Salinity and temperature were  
157 measured using a YSI probe (Yellow Springs, Ohio, USA). For all samples, the water was  
158 pre-filtered through a 65- $\mu\text{m}$  Nitex mesh and filtered sequentially through 142-mm  
159 diameter, 1.2- $\mu\text{m}$  nominal pore-size glass-fibre (GC50 Advantec MFS, Dublin, CA., USA) and  
160 0.22- $\mu\text{m}$  pore-size polyvinylidene (Millipore, Bedford, MA, USA) filters. Viral size particles in  
161 the filtrate were concentrated to ~500 mL (viral concentrate) using tangential flow  
162 ultrafiltration with a 30kDa MW prep-scale Spiral Wound TFF-6 cartridge (Millipore) (53).

### 163 **Nutrients**

164 Phosphate, silicate and nitrate+nitrite concentrations were determined in duplicate 15-mL  
165 seawater samples filtered through 0.45  $\mu\text{m}$  pore-size HA filters (Millipore) and stored at -  
166 20°C until air-segmented continuous-flow analysis on a AutoAnalyzer 3 (Bran+Luebbe,  
167 Norderstedt, Germany). Chlorophyll *a* (Chl *a*) was determined in triplicate by filtering 100  
168 mL of seawater onto 0.45  $\mu\text{m}$  pore-size HA filters (Millipore), and storing the filters in the  
169 dark at -20°C until acetone extraction and then analysed fluorometrically (54).



## 170 Enumeration of bacteria and viruses

171 Samples for viral and bacterial abundances were taken at each sampling point by fixing  
172 duplicate cryovials containing 980  $\mu\text{L}$  of sample with final concentration of 0.5%  
173 glutaraldehyde (EM-grade), freezing in liquid nitrogen and storing at  $-80^{\circ}\text{C}$  until  
174 processing. Flow cytometry samples were processed as in Brussaard *et al* (55). Briefly,  
175 viral samples were diluted 1:10 to 1:10 000 in sterile 0.1  $\mu\text{m}$  filtered 1X TE, stained with  
176 SYBR Green I (Invitrogen, Waltham, MA, USA) at a final concentration of  $0.5 \times 10^{-4}$  of  
177 commercial stock, heated for 10 minutes at  $80^{\circ}\text{C}$  and then cooled in the dark for 5 minutes  
178 before processing. Bacterial samples were diluted up to 1:1000 in sterile 0.1  $\mu\text{m}$  filtered  
179 1xTE, stained with SYBR Green I (Invitrogen) at a final concentration of  $0.5 \times 10^{-4}$  of  
180 commercial stock, and incubated in the dark for 15 minutes before processing. All samples  
181 were processed on a FACScalibur (Becton-Dickinson, Franklin Lakes, New Jersey, USA)  
182 with viral and bacterial samples run for 1 min at a medium or high flow rate, respectively.  
183 Event rates were kept between 100 to 1000 events per second and green fluorescence and  
184 side scatter detectors were used. Data were processed and gated using Cell-Quest software  
185 (Becton-Dickinson).

## 186 Extraction of viral nucleic acids

187 The viral concentrate was filtered twice through 0.22- $\mu\text{m}$  pore-size Durapore PVDF filters  
188 (Millipore) in a sterile Sterivex filter unit (Millipore). Viral sized particles in the filtrate  
189 were pelleted by ultracentrifugation (Beckman-Coulter, Brea, California, USA) in a SW40  
190 rotor at 108 000  $g$  for 5 h at  $12^{\circ}\text{C}$ . The pellet was resuspended overnight in 100  $\mu\text{L}$  of

191 supernatant at 4°C. To digest free DNA, the pellets were incubated with 1U  $\mu\text{L}^{-1}$  DNase with  
192 a final concentration 5 mM  $\text{MgCl}_2$  for 3 h at room temperature. Nucleic acids were extracted  
193 using a Qiamap Viral Minelute spin kit (Qiagen, Hilden, Germany) according to the  
194 manufacturer's directions.

### 195 **PCR amplification of T4-like virus marker gene**

196 To target the marine T4-like virus capsid protein gene (*gp23*), PCRs were set up as in Filee  
197 *et al* (42). Briefly, each reaction mixture (final volume, 50  $\mu\text{L}$ ) consisted of 2  $\mu\text{L}$  template  
198 DNA, 1x (final concentration) PCR buffer (Invitrogen, Carlsbad, California, USA), 1.5 mM  
199  $\text{MgCl}_2$ , 0.2 mM of each deoxynucleoside triphosphate (Bioline, London, UK), 40 pmol of  
200 MZIA1bis and 40pmol of MZIA6, and 1 U Platinum Taq DNA polymerase (Invitrogen) and  
201 was amplified using the program conditions as in Table 1.

### 202 **PCR amplification of marnavirus-like marker gene**

203 Half of each viral extract was used to synthesize complementary DNA (cDNA). To remove  
204 DNA, the extracted viral pellets digested with amplification-grade DNase 1 (Invitrogen).  
205 The reaction was terminated by adding 2.5 mM EDTA (final concentration) and incubating  
206 for 10 min at 65°C. Complementary DNA (cDNA) was generated using Superscript III  
207 reverse transcriptase (Invitrogen) with random hexamers (50 ng  $\mu\text{L}^{-1}$ ) as per the  
208 manufacturer.

209 PCR was performed using primer set MPL-2 to target the *RdRp* of marnavirus-like viruses  
210 (43). Each reaction mixture (final volume, 50  $\mu\text{L}$ ) consisted of 50 ng of cDNA, 1x (final  
211 concentration) PCR buffer, 2 mM  $\text{MgCl}_2$ , 0.2 mM of each deoxynucleoside triphosphate, 1

212  $\mu\text{M}$  of each primer, and 1 U Platinum Taq DNA polymerase. The reaction was run in a PCR  
213 Express thermocycler (Hybaid, Ashford, UK) with program conditions as in Table 1.  
214 Products were run on a 0.5X TBE 1% low melt gel, excised and extracted using Zymoclean  
215 Gel DNA Recovery Kit (Zymo, Irvine, California, USA) as per the manufacturer and a final  
216 elution step of  $2 \times 10 \mu\text{L}$  EB buffer (Qiagen).

## 217 **Filtration and extraction of marine bacteria and eukaryotes**

218 One liter from each 60-L seawater sample was filtered through a  $0.22\text{-}\mu\text{m}$  pore-size  
219 Durapore PVDF 47-mm filter (Millipore) in a sterile Sterivex filter unit (Millipore). The  
220 filter was either stored at  $-20^\circ\text{C}$  until extraction or immediately extracted as follows (56):  
221 Briefly, filters were aseptically cut and incubated with lysozyme (Sigma-Aldrich, St. Louis,  
222 MO, USA) at a final concentration of  $1\text{mg mL}^{-1}$  for 2 h at  $37^\circ\text{C}$ . Sodium dodecyl sulfate was  
223 added at a final concentration of 0.1% (w/v) and each filter was put through three freeze-  
224 thaw cycles. Proteinase K (Qiagen) was then added to a final concentration of  $100 \mu\text{g mL}^{-1}$   
225 and incubated for 1 h at  $55^\circ\text{C}$ . DNA was sequentially extracted using equal volumes of  
226 phenol:chloroform:isoamyl alcohol (25:24:1), and chloroform:isoamyl alcohol (24:1). DNA  
227 was precipitated by adding NaCl to a final concentration of 0.3M and by adding 2X the  
228 extract volume of ethanol. Samples were incubated at  $-20^\circ\text{C}$  for at least 1 h and then  
229 centrifuged for 1 h at  $20\ 000\ g$  at  $4^\circ\text{C}$ . Extracts were washed with 70% ethanol and  
230 resuspended in  $50 \mu\text{L}$  EB buffer.

## 231 **PCR amplification of bacterial and eukaryotic ribosomal sequences**

232 PCR targeting eukaryotes used primers Euk1209f and Uni1392r (57). These primers target  
233 positions 1423 to 1641 and include the variable region V8. Each reaction mixture (final  
234 volume, 50  $\mu$ L) consisted of 2  $\mu$ L template, 1x (final concentration) PCR buffer, 1.5 mM  
235 MgCl<sub>2</sub>, 0.2 mM of each deoxynucleoside triphosphate, 0.3  $\mu$ M of each primer, and 2.5 U  
236 Platinum Taq DNA polymerase. The reaction was run in a PCR Express thermocycler with  
237 program conditions as in Table 1.

238 PCR targeting bacteria used primers 341F (58) and 907R (59). These primers target the v3  
239 to v5 regions. PCRs were run with the following conditions: each reaction mixture (final  
240 volume, 50  $\mu$ L) consisted of 2  $\mu$ L template, 1x (final concentration) PCR buffer, 1.5 mM  
241 MgCl<sub>2</sub>, 0.2 mM of each deoxynucleoside triphosphate, 0.4  $\mu$ M of each primer, and 1 U  
242 Platinum Taq DNA polymerase. The reaction was run in a PCR Express thermocycler with  
243 program conditions as in Table 1.

## 244 **Sequencing library preparation**

### 245 **Construction**

246 PCR products not requiring gel excision were purified after PCR using AMPure XP beads  
247 (Beckman Coulter) at a ratio of 1.2:1 beads:product. Cleaned products were resuspended in  
248 30  $\mu$ L EB buffer (Qiagen). All products were quantified using the Picogreen dsDNA  
249 (Invitrogen) assay using Lambda DNA (Invitrogen) as a standard. Sample concentrations  
250 were read using iQ5 (Bio-Rad, Hercules, CA, USA) and CFX96 Touch systems (Bio-Rad).

251 Pooled libraries were constructed using one of each of the amplicons at a concentration so  
252 that their molarity would be similar and the total product of the pool to be ~700-900 ng.  
253 Pooled amplicons were concentrated using AMPure XP beads (Beckman Coulter) at a ratio  
254 of 1.2:1 beads:product. NxSeq DNA sample prep kit 2 (Lucigen, Middleton, WI, USA) was  
255 used as per manufacturer's directions with either NEXTflex 48 barcodes (BioO, Austin,  
256 USA), NEXTflex 96 HT barcodes (BioO), or TruSeq adapters (IDT, Coralville, Iowa).  
257 Libraries were cleaned up using AMPure XP beads (Beckman Coulter) at a ratio of 0.9:1  
258 beads:library.

### 259 **Quantification and quality control of libraries**

260 Libraries were checked for small fragments (primer dimers and/or adapter dimers) using a  
261 2100 Bionalyzer (Agilent, Santa Clara, CA, USA) with the High Sensitivity DNA kit  
262 (Agilent). The concentration of libraries was quantified using Picogreen dsDNA assay as  
263 above. The libraries were quantified and checked for amplifiable adapters using the Library  
264 Quantification DNA standards 1-6 (Kappa Biosystems, Wilmington, USA) with the SsoFast  
265 EvaGreen qPCR supermix (Bio-Rad) using 10  $\mu$ L EvaGreen master mix, 3  $\mu$ L of 0.5  $\mu$ M F  
266 primer, 3  $\mu$ L of 0.5  $\mu$ M R primer and 4  $\mu$ L of 1:1000, 1:5000 and 1:10000 dilutions of the  
267 libraries in triplicate on iQ5 (Bio-Rad) and CFX96 Touch qPCR machines. Cycling  
268 parameters were as follows: 95°C for 30s, 35 cycles of 95°C for 5s, 60°C for 30s, and the  
269 melt curve generation from 65°C to 95°C in 0.5°C steps (10s/step). Quantification from  
270 both Picogreen and qPCR assays were used to determine final pooling of all libraries before  
271 sequencing. Libraries were sequenced using 2x250bp PE Miseq (Illumina, San Diego, USA)  
272 sequencing at Génome Québec Innovation Centre at the McGill University (Montreal, QC,

273 Canada), and 2x300bp PE Miseq (Illumina) sequencing at UBC Pharmaceutical Sciences  
274 Sequencing Centre (Vancouver, BC, Canada) and at UCLA's Genoseq (Los Angeles, CA, USA).

## 275 **Sequence processing**

276 Libraries were either split by the sequencing center using CASAVA (Illumina) or with Miseq  
277 Reporter software (Illumina). Sequence quality was initially examined using FastQC  
278 (<http://www.bioinformatics.bbsrc.ac.uk/projects/fastqc/>). Contaminating sequencing  
279 adapters were removed using Trimmomatic version 0.32 (60) and the quality of the  
280 sequencing library further examined using fastx\_quality (61). Libraries were further split  
281 into individual amplicons (i.e. 18S, 16S, *gp23* and *RdRp*) and then, if the expected overlap of  
282 the paired-end reads was 40bp or more, the paired reads were merged using PEAR (62).  
283 For 16S the expected overlap was right around the cut-off, therefore instead the sequences  
284 were aligned to the SILVA database and then assigned to either the forward or reverse  
285 primer based on their position. Then the forward and reverse reads were concatenated.  
286 However, the reverse primer sequenced less readily than the forward and thus much  
287 information was lost if only sequences with both forward and reverse were kept, therefore  
288 only the forward reads were used for further analysis. All sequences were then quality  
289 trimmed using Trimmomatic with the default quality settings. Sequences were aligned to  
290 known sequences (Silva 119 database (63) for 16S and 18S rRNA genes) using align.seqs in  
291 mothur 1.33.3 (64) and those not aligned were removed. Viral sequences were queried  
292 using BLAST against databases containing the gene markers of interest from viral isolates  
293 and from other environmental surveys and sequences with hits with an e-value below  $10^{-3}$   
294 were kept.

295 The 16S and 18S rRNA gene sequences were checked for chimeras using USEARCH version  
296 8.0.1517 (65) with the Gold reference database. Unique, non-chimeric sequences were  
297 clustered at 97% similarity. Taxonomy for the 16S and 18S rRNA gene sequences was  
298 assigned using mothur (Wang-type algorithm) using the Silva 119 taxonomy (63). For the  
299 viral targets sequences were chimera-checked using USEARCH denovo and reference (65).  
300 Viral sequences were then translated using FragGeneScan 1.20 (66). Viral reads were  
301 clustered using USEARCH (65) at 95% similarity for MVL, and 95% similarity for T4-like  
302 viruses. Since OTU clustering sequence similarity cut-offs are not well-defined for viruses,  
303 percent similarities (at the protein level) were examined at 50% to 100% for both MVL and  
304 T4-like viruses to examine an appropriate level these values chosen for similarity. For  
305 gp23, genera can have 35% protein similarity (67). When the number of OTUs compared to  
306 the percent similarity at 95% the rise in the number of OTUs was still linear and above  
307 95% the slope more quickly (indicating many more OTUs picked with each per percent  
308 similarity increase) thus this level it was still sensitive without splitting potential groups  
309 and similar levels and approach as in other studies (68, 69). For MLV it was as previously  
310 described (70) and chosen at 95% sequence similarity at the protein level. This approach is  
311 similar to another OTU-based study targeting ssRNA viruses in coral photosymbionts (71).  
312 Operational taxonomic unit (OTU) tables for all targets were constructed using USEARCH  
313 (65). Rarefaction curves were generated using vegan (72). Sequences were normalized for  
314 by date and by target using vegan's rarefy (72). All of the initial sequence files have been  
315 deposited in NCBI's BioProject database under ID PRJNA406940.

## 316 **Data analysis, multivariate statistics and phylogenetic analysis**

317 Environmental parameters with missing data, because of instrument malfunction or  
318 unavailability, were mean imputed to fill in missing values. Day length data were retrieved  
319 using R package *geosphere* (73). Adonis was used as implemented in *vegan* (72) to test  
320 whether community matrices showed seasonal differences. Bray-Curtis distance matrices  
321 were constructed from the normalized OTU abundance tables. Mantel tests were  
322 performed by comparing the community distance matrices to each other and to distance  
323 matrices of environmental parameters as implemented in *vegan* (72).

324 NCBI CDD domain alignments for *RdRp* and *gp23* were retrieved and used as hidden  
325 Markov models via HMMER (74) to align translated OTUs with Clustal Omega (75).  
326 Environmental sequences for both *gp23* (17, 42, 76–81) and *RdRp* (43, 45) were retrieved  
327 from Genbank to give context to the OTUs.

328 Alignments were viewed and manually curated with *aliview* (82). Automated trimming of  
329 the alignments was done using *Trimal* (83). Initial phylogenetic trees were built with *Fast*  
330 *Tree* (84). Final maximum likelihood trees were generated using *RAxML* (85) with 1000  
331 bootstraps, with VT with the *PROTGAMMA* model for the *RdRp* gene tree and JTT with the  
332 *PROTGAMMA* model for the *gp23* gene tree chosen using *Protest* (86). Faith's phylogenetic  
333 diversity (87) was calculated as implemented in *picante* (88). The package *ggtree* (89) was  
334 used for visualizing and annotating trees and all other plots were created using R (90). All  
335 scripts used for processing the data are available at:  
336 [https://github.com/joolia/phylo\\_temporal\\_jericho](https://github.com/joolia/phylo_temporal_jericho) (doi: 10.5281/zenodo.2554772).



## 337 **Results**

### 338 **Variability of environmental characteristics**

339 Chlorophyll *a* (chl *a*) concentrations varied over time with a maximum observed  
340 concentration during a eukaryotic phytoplankton bloom ( $46.5 \mu\text{g L}^{-1}$  in June 2011)(Fig. S1).  
341 The second highest chl *a* occurred during the annual spring bloom in late April 2011 ( $5.88$   
342  $\mu\text{g L}^{-1}$ ) which is mainly composed of diatoms belonging to *Thalassiosira* sp. (91, 92). The  
343 minimum chl *a* value of  $0.05 \mu\text{g L}^{-1}$  occurred in May and the chlorophyll levels remained  
344 below  $1 \mu\text{g L}^{-1}$  from September to March.

345 Nutrient concentrations were also highly dynamic ranging between  $6.1 \mu\text{M}$  to  $67.3 \mu\text{M}$  for  
346 silicate, from below  $0.1 \mu\text{M}$  to  $2.3 \mu\text{M}$  for phosphate and from below  $0.1 \mu\text{M}$  to  $27.7 \mu\text{M}$  for  
347 nitrate+nitrite (Fig. S1). Overall, nutrient concentrations were high and stable over winter,  
348 dipped in late April and then were followed by a large increase in silicate commencing in  
349 May.

### 350 **Variability of viral and bacterial abundance**

351 During the time series, the viral abundance ranged from  $5.41 \times 10^6$  to  $4.70 \times 10^7$  particles  
352  $\text{mL}^{-1}$  while the bacterial abundance was one order of magnitude lower ranging from  
353  $6.59 \times 10^5$  to  $4.43 \times 10^6$  cells  $\text{mL}^{-1}$  (Fig. S1).

## 354 **Shared viral and microbial OTUs over time**

355 Amplicon target reads representing marnavirus-like viruses (*RdRp*) and T4-like viruses  
356 (*gp23*) were translated into amino acids and the reads were normalized to the library with  
357 fewest reads. The 16S and 18S reads were normalized the same way using the nucleotide  
358 sequences. This resulted in 566 OTUs at 95% sequence similarity for the marnavirus-like  
359 viruses, with between 59 and 142 OTUs per timepoint with an average of 6% of these OTUs  
360 shared over time (Fig. S2). For the T4-like viruses there were a total of 1737 OTUs at 95%  
361 sequence similarity, with a minimum of 149 and a maximum of 484 OTUs per timepoint  
362 (Fig. S2). On average, 6% of the T4-like viruses OTUs were shared among all timepoints.  
363 There were 813 bacterial OTUs (97% sequence similarity) with an average of 10% shared  
364 over time. The lowest number of OTUs seen per timepoint was 84 and the highest number  
365 was 269. The phylum-level classifications showed a dominance of Proteobacteria and  
366 Bacteroidetes and Cyanobacteria showing large fluctuations (Fig. S3). In the eukaryotic  
367 community a total of 1115 OTUs (97% sequence similarity) were found with 6% shared on  
368 average, a minimum of 55 and a maximum of 298 (Fig. S2). The phylum-level classifications  
369 showed a dominance of the SAR group with Ophisthokonta, Haptophyta and  
370 Cryptophyceae making up the majority of the sequences recovered (Fig. S4). Rarefaction  
371 curves for individual samples did not flatten ("saturate") indicating that not all possible  
372 OTUs were sequenced in these samples, but when considered together the curves saturated  
373 indicating that even if all the diversity was not captured in one sample, the overall  
374 community of OTUs was captured (Fig. S5).

## 375 **Dynamics of phylogenetically-related viral OTUs**

376 Viral OTUs were placed into a phylogenetic context and their dynamics examined over time  
377 (Fig. 1, Fig. S6 and Fig. S7). Well-defined and well-supported phylogenetic groups (A-H) of  
378 marnavirus-like viruses (Fig. 1A and B) showed strong temporal dynamics and differed by  
379 season (Adonis  $R= 0.503$ ,  $P$ -value= 0.001). Group H, which included isolated viruses  
380 infecting the diatoms *Chaetoceros* sp., and *Rhizoselenia* sp., were constant members of the  
381 communities although their relative abundance was highest in late November. Group A was  
382 always present and included many environmental sequences, as well as sequences from a  
383 virus that infects the raphidophyte, *Heterosigma akashiwo*; the group was most abundant  
384 between August and September. The winter months from October to February were  
385 dominated by OTUs in Group E, with a smaller contribution by Group H. The structure of  
386 the MVL OTU phylogenetic groups closely mirrored the structure of the top 20 OTUs found  
387 over time (Fig. S8), demonstrating that this community contained few dominant OTUs.

388 The T4-like virus OTUs were also placed in a phylogenetic context and categorized into  
389 groups of related OTUs (Fig. 1 C). In the fall, Group I dominated the community, followed by  
390 Group G; both groups included viral isolates infecting cyanobacteria. In January 35.7% of  
391 the relative abundance of the T4-like viruses was represented by Group B which contains  
392 no known isolates. Unlike the MVL community, the T4-like virus community had very  
393 different patterns among the top 20 OTUs and the phylogenetic groups over time (Fig. S9).

394 When there was a large increase in nutrients in late September (Fig. S1), the dominant  
395 groups in the community shifted. The community returned to its previous state by the next

396 sampling time. The T4-like virus communities showed small differences by season (Adonis  
397  $R = 0.23$ ,  $P$ -value = 0.001)

### 398 **Richness of related viruses over time**

399 Within phylogenetic groupings the richness of OTUs varied over time in the viral  
400 communities (Fig. 2, Fig. S10 and Fig. 3, Fig. S11). Often, within the groups, the richness and  
401 relative abundance increased at the same timepoint indicating that at periods when these  
402 groups of OTUs appeared to dominate the overall communities, there was an increase in  
403 alpha diversity within the group.

404 Examining the richness over time for MVL viruses, for OTUs in group A there was a peak in  
405 relative abundance and richness in the Fall and later the richness dramatically decreased  
406 but this group showed continued presence over time. Similar patterns were observed for  
407 groups E and G where there was a peak in their abundance and richness at one point in the  
408 time series and otherwise a low, but detectable level of viruses. Conversely, for group H the  
409 pattern is different whereby the richness and relative abundance fluctuate but the peaks  
410 and troughs are less steep than in the other groups indicating a larger number of persistent  
411 OTUs. Group H comprised a large proportion of the overall OTUs (47% percent overall)  
412 which affects the relative dynamics observed in the MVL community.

413 For the T4-like viruses, Groups A, C and D had similar dynamics during the time series  
414 where they showed high richness for their group in June-August, then lower richness from  
415 August until February, and then in February there was a small peak in richness. These  
416 groups did not show large increases or decreases in the relative abundance but made up a

417 small proportion overall of the relative abundance throughout the time series. Groups B, G,  
418 H and I had dynamics whereby they showed a continued presence throughout the time  
419 series with fluctuations between timepoints and at times a high relative abundance  
420 attributed to these groups. Groups E and F showed higher richness in the Fall than the rest  
421 of the year and a small peak in February.

422 There were many persistent and ephemeral OTUs over time in the viral communities (Fig.  
423 2 and Fig. 3). Furthermore, many of the ephemeral viral OTUs were also related to the  
424 persistent viral OTUs. In the T4-like viruses there were many more OTUs than for the  
425 marnavirus-like viruses, however, both communities fluctuated over time (0.9% of the  
426 OTUs were found at 90% of the timepoints for MVL, vs. 0.8% of the OTUs in the T4-like  
427 viruses). In the T4-like viruses Groups A, B, G and F contained both persistent and  
428 ephemeral OTUs. Conversely group C had few OTUs that persisted. In the MVL viruses  
429 there were fewer OTUs overall and also fewer OTUs that persisted over time. Group A had  
430 one OTU that persisted over time and other OTUs that were only found at 4-6 sampling  
431 points, which encompassed 8 to 12 weeks at the sampling site.

## 432 **Lagged correlations with hosts over time**

### 433 **Raphidophytes and marnavirus-like viral Group A**

434 Group A (Fig. 1A), which includes HaRNAV, a virus which infects the raphidophyte  
435 *Heterosigma akashiwo*, increased in relative abundance after the relative abundance of  
436 eukaryotic sequences classified as raphidophytes increased (Fig. 4, Spearman rank  
437 correlation over entire time series: 0.43 and *P*-value 0.07). There were further peaks in the

438 relative abundance of raphidophyte sequences, but they did not coincide with increases in  
439 the relative abundance of marnavirus-like viral Group A. Of all the OTUs in Group A, OTU 1  
440 was relatively most abundant, and when aligned with other closely related sequences (Fig.  
441 S12) these sequences showed changes in the amino acid D to E in the palm region of the  
442 *RdRp* (93).

#### 443 **Cyanobacteria and T4-like virus Group I**

444 Comparing the T4-like virus Group I, which contains cyanophage isolates, to cyanobacterial  
445 OTUs (Fig. 5), showed that the relative abundance of viruses increased in the fall after  
446 peaks in the relative abundance of cyanobacterial OTUs (correlation over entire time  
447 series: 0.56, *P*-value: 0.03). The lags in relative abundances of putative cyanophages  
448 relative to cyanobacteria continued, and after the spring diatom bloom (April 8th) there  
449 was a lag before the relative abundance of a different putative cyanophage in Group I  
450 increased, showing succession in the viral community.

451 The community similarity of the T4-like viruses had a strong lagged negative correlation to  
452 the richness of the bacterial community (Fig. S13 and Fig. 6). The correlations to the MVL  
453 community were much stronger to other communities when lagged than when directly  
454 compared. Viral abundance was negatively correlated to bacterial community similarity.

#### 455 **Mantel tests among community similarity**

456 Mantel tests were used to examine concurrent community and environmental changes over  
457 time (Fig. 6). The overall bacterial and eukaryotic community compositions fluctuated  
458 strongly together. The marnavirus-like community changes were predicted most strongly

459 by changes in the eukaryotic community with a lag of two weeks and less strongly by the  
460 bacterial and myoviral communities. The T4-like viruses showed changes most strongly  
461 with the bacterial communities with a two-week lag, however also the eukaryotic and  
462 marnavirus-like communities with lags were also strong predictors of the myoviral  
463 communities.

## 464 **Discussion**

### 465 **Temporal shifts in community dominance by groups of related viruses**

466 A major theme in microbial ecology is understanding the causes of temporal shifts in  
467 community composition. Previously, a study at the Bermuda Atlantic Time series Study  
468 (BATS) used deep sequencing of amplicons of the viral gene marker *pho h*, to resolve  
469 phylogenetically distinct groups of viral populations that differed between fall and winter;  
470 these differences were attributed to a phylogenetic group containing cyanobacteria-  
471 infecting viruses and to water stratification (35). In our study, in coastal British Columbia,  
472 the temporal dynamics were driven by shifts in groups of phylogenetically-related OTUs  
473 (Fig. 1) and there was a consistently high diversity of OTUs in the viral communities. The  
474 dynamics of MVL viruses were similar when examined as groups of related viruses (Fig.  
475 1B) and as the top 20 MVL OTUs over time (Fig. S8) indicating an uneven community as has  
476 been previously seen (46, 47, 70). Conversely, in the T4-like viruses the patterns among  
477 phylogenetically-related groups did not resemble the patterns of the top 20 OTUs,  
478 indicating that the community was more diverse and even. Even with these differences, the  
479 phylogenetic dynamics fluctuated in both the T4-like and MVL viruses even though viral

480 richness stayed relatively constant over time (Fig. 2, Fig. 3, Fig. S2). Dynamics within the  
481 phylogenetic groups showed several different patterns that could be classified as having  
482 one large peak per year, several peaks or a constant presence in the community. These  
483 different dynamics could represent differences in lifestyles (r- or K-selected) (94), hosts, or  
484 the influence of environmental parameters. This would help explain how constant co-  
485 evolution or co-presence of viruses that is likely a factor in the Killing the Winner model  
486 (30).

487 The dynamics of the phylogenetic groups reflect that viral and microbial communities can  
488 be stable at the genus level and above, but are dynamic at the strain or species level (31).  
489 Furthermore, taxonomically related species can have similar niches and ecology (36, 37).  
490 For example, although there are exceptions, viruses infecting marine cyanobacteria and  
491 eukaryotic phytoplankton fall into different phylogenetic clusters depending on the host  
492 that they infect (95, 96), consistent with the hosts representing specific niches.  
493 Alternatively, given that the genetic similarity of marker gene sequences predicts gene  
494 content in at least some groups of double-stranded DNA viruses (96), and that viral gene  
495 content or GC ratios may result in light-dependent effects on growth or nutrient effects (97,  
496 98), it is likely that environmental factors may have different influences on different  
497 phylogenetic groups of viruses. For example, Moniruzzaman *et al* (99) saw increased  
498 activity of ssRNA viruses with the termination of a phytoplankton bloom. Consequently, the  
499 phylogenetic signal is a very important part of the community structure.

500 Previously it has been found that the largest OTUs were persistent throughout time and it  
501 was suggested that transient viruses were dispersed from different areas (31). This seems



502 unlikely in our study since it was frequent that the ephemeral viruses were closely related  
503 to the persistent viruses. Furthermore, both persistent and ephemeral viruses of  
504 phytoplankton were found in a freshwater lakes (100, 101), and at a coastal site (56),  
505 where some ephemeral viruses were correlated with shifts in environmental parameters.  
506 In another freshwater study it appeared that most viruses were transient and the system  
507 saw a very quick turnover (33). Additionally, in marine T4-like-virus communities, some  
508 OTUs persisted but many more were ephemeral in 3-year (17) and 2-year (18) time series.  
509 Furthermore, in a daily study of T4-like viral communities, few large-scale increase or  
510 decrease events were seen and overall the changes in both the bacterial and T4-like-viral  
511 communities were slow (102). Additionally, the data show that some OTUs are persistent  
512 and thus continually successful, while others are ephemeral (Fig. S10 and Fig. S11) with  
513 some of the viral groups having no persistent OTUs (T4-like C and D and MVL B, C, D, F and  
514 G). Therefore, both eukaryotic and bacterial marine viruses show the pattern of ephemeral  
515 and persistent viruses and adding the phylogenetic relatedness gives a deeper  
516 understanding of these dynamics.

## 517 **Potential quasispecies behaviour**

518 The population structure of RNA viruses is proposed to be a mixture of genotypes called  
519 quasispecies that are produced through polymerase errors; they encompass the  
520 community of genotypes theoretically produced from one infection (103, 104). It is  
521 proposed to be a result of higher mutation rates and higher burst sizes found in RNA  
522 viruses compared to double-stranded DNA viruses (105). However, it is theoretically  
523 possible for quasispecies to exist in DNA bacteriophage populations (106). In high

524 confidence viral DNA metagenomes there is heterogeneity in assembled reads beyond  
525 expected sequencing errors (107), and there is site-specific variation in DNA viral genome  
526 populations studied in humans (108). Thus a sequenced viral genome could be considered  
527 to be an "average" of individual genotypes. In viral RNA metagenomic sequences observed  
528 in an Antarctic lake, the ecological setting likely influences the presence of quasispecies  
529 (109) since there are more single-nucleotide variations (SNVs) in the lake-water  
530 metagenomes than in the microbial mats that they studied. This is explained either by  
531 higher turnover in the lake water, and thus more ecological niches/diversity in these  
532 samples, or as the result of convergence of water from more locations (109). When the  
533 OTUs in the marnavirus-like Group A (group which includes viral isolate *HaRNAV*) were  
534 visualized as an alignment (Fig. S12), a small number of the differences between the  
535 ephemeral and persistent OTUs were randomly spread across the gene fragment; however,  
536 most of the differences were in the "palm" section of the catalytic site C (93) where at a  
537 specific position the most persistent viral sequence had D and the ephemeral sequences  
538 had E. These ephemeral sequences point to a population that is marginally successful while  
539 the most abundant OTU (OTU\_2, retaining the D amino acid) remains persistent. This  
540 suggests that the high diversity of related-viruses means a successful large-scale infection  
541 event as seen in clinical studies (104) and this suggests that this phenomenon could be  
542 prevalent in marine settings (and should be incorporated into current ecological theories  
543 (e.g. KtW)).

544 **Implications for theories related to community structure and**  
545 **dynamics**

546 In the Killing the Winner model, viruses infect the most active organism (28). One  
547 interpretation is that hosts compete for limiting resources which determine the community  
548 composition at a particular site, and viruses determine the specific host species and the  
549 abundance of these hosts (110). With the lagged dynamics observed in the raphidophytes  
550 and viruses related to raphidophyte-infecting viruses, the "winner" has been killed (Fig. 4).  
551 Subsequently, there is a small increase in the relative abundance of raphidophytes but no  
552 associated increase in RdRp viral Group A. There are several explanations for the increase  
553 in raphidophytes without an observed increase in viral Group A. Possible explanations are  
554 that the surviving raphidophytes were resistant to specific viruses after infection (111), in  
555 this case members from viral Group A, or that the number of susceptible hosts was too low  
556 to allow for a detectable increase in viruses. Alternatively, a different subset of viruses,  
557 such as the DNA virus HAV (112), or protist grazing (113) could be keeping populations  
558 low, and thus preventing the replication of the Group A viruses. Similar patterns were  
559 detected in T4-like myoviral Group I (including isolates from *Prochlorococcus* phage  
560 *PSSM2* and *Synechococcus* phage *SSM2*) and cyanobacteria (Fig. 5). These types of patterns  
561 have been observed in other studies where there were many viral OTUs detected with  
562 strong time-lagged correlations to bacterial OTUs (40). Also, in a mesocosm experiment  
563 with *Emiliania huxleyi* there was a peak in host abundance and then four days later a peak  
564 in *Emiliania huxleyi* Virus (EhV) abundance (114). Rapid shifts in fine-scale viral dynamics  
565 and stability at coarse scale viral dynamics suggest that the Killing the Winner theory is

566 operating at the strain level (31, 32, 115) preserving bacterial strain level diversity (12,  
567 29).

568 In the marine environment, viruses, at the coarse scale of family or genus, could show  
569 Killing the Winner dynamics with finer scale dynamics at the strain level. This bank or seed  
570 bank model (41) explains how high local viral diversity (shuffling of viruses) can be  
571 consistent with low overall global diversity (represented by the most abundant viruses) by  
572 a constant local production of viruses has been supported by many studies (17, 116–118).  
573 Previously it has been found that the viral community was mostly dominated (>50%) by a  
574 few successful OTUs and the rest of the OTUs were rare and contained in the "bank" (35).  
575 We hypothesized that the communities would have a "seed bank" where there is shuffling  
576 in rank of phylogenetically-related viruses along a rank-abundance curve, however, when  
577 examined with the phylogenetic signal it is not a shuffling of rank of these related viruses  
578 as there are few viral OTUs that dominate within each phylogenetic group that dominate  
579 over time and the other OTUs are ephemeral. Thus the seed bank glosses over important  
580 information revealed by the phylogenetic examination of this communities. This seed bank  
581 idea could be effective at different time scales, but at the scale of one year with samples  
582 every two weeks there was no evidence of shuffling of rank of viruses within these viral  
583 groups. Our study has deepened this understanding by showing that the relatedness of the  
584 viruses is crucial to understanding their dynamics and reveals that the seed bank does not  
585 appear to be operating as described. Our data reveal that the viruses within phylogenetic  
586 groups can be ephemeral and related to persistent viruses and that groups of related  
587 viruses can become abundant through ecological processes (e.g. through habitat filtering  
588 where closely related species can persist in a particular environment (119)).

## 589 **Caveats**

590 Although the challenges with viral gene markers (43, 70) and PCR in general (120) have  
591 been discussed, it remains an excellent approach for examining population structures.  
592 Although it could be argued that rare and putative quasispecies OTUs could result from  
593 PCR errors (121) or sampling anomalies (122), this is unlikely given that these OTUs were  
594 seen multiple times in different samples, implying that they are not spurious. To increase  
595 confidence in the results, some libraries with fewer reads were excluded so that more  
596 sequence could be used overall when normalizing samples (121) even though this has the  
597 trade-off of decreasing the number of samples. The sequences were checked for chimeras  
598 since chimeras can form as a result of high cycle number (123). Hence, although the read  
599 abundance of OTUs is semi-quantitative, it is a good approach for comparing richness and  
600 diversity among samples (but not for absolute counts of genes) (121). Thus, we are  
601 confident that our results conservatively reflect the changes that occurred in these  
602 microbial communities.

## 603 **Conclusions**

604 Phylogenetically-related viruses showed temporal patterns of dominance within the viral  
605 communities over time. As well, viral communities showed evidence of time-lagged  
606 dynamics related to the potential host communities, where, for example, marnavirus-like  
607 viral (MVL) group A (containing isolate *HaRNAV*) was correlated in a lagged fashion to the  
608 raphidophytes, and myoviral virus group I (containing isolates *PSSM2* and *SSM2*) was  
609 correlated with cyanobacteria. MVL-like and myoviral viral communities differed in fine-

610 scale community structure illustrated by differences in the proportion of OTUs that  
611 persisted over time, the evenness, and the diversity of the communities.

612 The MVL, which contained isolates with high burst sizes, exhibited potential quasispecies-  
613 type behaviour whereby OTUs at one timepoint were composed of many different closely  
614 related viruses and the differences between the ephemeral and persistent OTUs differed  
615 mostly in a protein residue at a catalytic site suggesting that this diversity could originate  
616 within one infection.

617 Previously, the link between dominance, persistence and phylogeny of virus-host  
618 communities has largely been overlooked. Other studies have found that many viral OTUs  
619 are ephemeral and that few are persistent; whereas, this study demonstrated that most of  
620 the ephemeral viral OTUs were closely related to a persistent viral OTU, and that over time  
621 the community was dominated by different phylogenetic viral groups composed of related  
622 ephemeral and persistent OTUs.

623 Hence, the observed changes were not the result of the presence of a seed bank that led to  
624 an overall shuffling in ranks of OTUs in the community, but rather the changes were related  
625 to fluctuations in the dominance of different phylogenetic groups of viruses over time.

626 These dynamics thus add an important insight about the structure of viral communities  
627 and are thus crucial for understanding these viral communities.

## 628 **Acknowledgements**

629 Suttle lab and Beaty Biodiversity members assisted greatly through discussions,  
630 manuscript improvements, assisting in field work and facilitating laboratory and analytical

631 work. In particular the contributions of A.M. Chan, C. Chénard, C-E Chow, J.L. Clasen, C.  
632 Deeg, J.F. Finke, T.J. Heger, X.A. Tian, M. Vlok, and X. Zhong are gratefully acknowledged. C.  
633 Payne conducted the nutrient analyses and R. Pawlowicz provided the YSI probe. Thanks  
634 also to A.M. Comeau and A.I. Culley for providing reference alignments for *gp23* and *RdRp*,  
635 respectively. The research was made possible through funding from NSERC through PGS-M  
636 and PGS-D awards to JAG, and Discovery Research and Ship-time Grants to CAS, fellowships  
637 to JAG from UBC and the Beaty Biodiversity Center through a BRITE award from an NSERC  
638 CREATE grant. The Canada Foundation for Innovation and the British Columbia Knowledge  
639 Development Fund funded equipment purchases that allowed the work to be done.

## 640 **Conflict of Interest**

641 The authors declare no conflict of interest.

## 642 **References**

- 643 1. Lynch MDJ, Neufeld JD. 2015. Ecology and exploration of the rare biosphere. *Nature*  
644 *Reviews Microbiology* 13:217–229.
- 645 2. DuRand MD, Olson RJ, Chisholm SW. 2001. Phytoplankton population dynamics at the  
646 Bermuda Atlantic Time-series station in the Sargasso Sea. *Deep Sea Research Part II:*  
647 *Topical Studies in Oceanography* 48:1983–2003.

- 648 3. Morris RM, Vergin KL, Cho J-C, Rappé MS, Carlson CA, Giovannoni SJ. 2005. Temporal and  
649 spatial response of bacterioplankton lineages to annual convective overturn at the  
650 Bermuda Atlantic Time-series Study site. *Limnology and Oceanography* 50:1687–1696.
- 651 4. Fuhrman JA, Hewson I, Schwalbach M, Steele J, Brown M, Naeem S. 2006. Annually  
652 reoccurring bacterial communities are predictable from ocean conditions. *Proceedings of*  
653 *the National Academy of Sciences* 103:13104–13109.
- 654 5. Gilbert JA, Field D, Swift P, Newbold L, Oliver A, Smyth T, Somerfield PJ, Huse S, Joint I.  
655 2009. The seasonal structure of microbial communities in the Western English Channel.  
656 *Environmental Microbiology* 11:3132–3139.
- 657 6. Suttle CA. 2005. Viruses in the sea. *Nature* 437:356–361.
- 658 7. Paul JH. 2008. Prophages in marine bacteria: Dangerous molecular time bombs or the  
659 key to survival in the seas? *The ISME Journal* 2:579–589.
- 660 8. Brum JR, Schenck RO, Sullivan MB. 2013. Global morphological analysis of marine viruses  
661 shows minimal regional variation and dominance of non-tailed viruses. *The ISME Journal*  
662 7:1738–1751.
- 663 9. Breitbart M. 2012. Marine viruses: Truth or dare. *Annual Review of Marine Science*  
664 4:425–448.
- 665 10. Lang AS, Rise ML, Culley AI, Steward GF. 2009. RNA viruses in the sea. *FEMS*  
666 *Microbiology Reviews* 33:295–323.



- 667 11. Moreau H, Piganeau G, Desdevises Y, Cooke R, Derelle E, Grimsley N. 2010. Marine  
668 Prasinovirus genomes show low evolutionary divergence and acquisition of protein  
669 metabolism genes by horizontal gene transfer. *Journal of Virology* 84:12555–12563.
- 670 12. Rodriguez-Valera F, Martin-Cuadrado A-B, Rodriguez-Brito B, Pašić L, Thingstad TF,  
671 Rohwer F, Mira A. 2009. Explaining microbial population genomics through phage  
672 predation. *Nature Reviews Microbiology* 7:828–836.
- 673 13. Bergh O, Borsheim KY, Bratbak G, Heldal M. 1989. High abundance of viruses found in  
674 aquatic environments. *Nature* 340:467–468.
- 675 14. Jiang SC, Paul JH. 1994. Seasonal and diel abundance of viruses and occurrence of  
676 lysogeny/bacteriocinogeny in the marine environment. *Marine Ecology-Progress Series*  
677 104:163–172.
- 678 15. Winget DM, Helton RR, Williamson KE, Bench SR, Williamson SJ, Wommack KE. 2011.  
679 Repeating patterns of virioplankton production within an estuarine ecosystem.  
680 *Proceedings of the National Academy of Sciences* 108:11506–11511.
- 681 16. Parsons RJ, Breitbart M, Lomas MW, Carlson CA. 2012. Ocean time-series reveals  
682 recurring seasonal patterns of virioplankton dynamics in the northwestern Sargasso Sea.  
683 *The ISME Journal* 6:273–284.
- 684 17. Chow C-ET, Fuhrman JA. 2012. Seasonality and monthly dynamics of marine myovirus  
685 communities: Marine myovirus community dynamics at SPOT. *Environmental Microbiology*  
686 14:2171–2183.

- 687 18. Pagarete A, Chow C-ET, Johannessen T, Fuhrman JA, Thingstad TF, Sandaa RA. 2013.  
688 Strong seasonality and interannual recurrence in marine myovirus communities. *Applied*  
689 *and Environmental Microbiology* 79:6253–6259.
- 690 19. Waterbury JB, Valois FW. 1993. Resistance to co-occurring phages enables marine  
691 *Synechococcus* communities to coexist with cyanophages abundant in seawater. *Applied*  
692 *and Environmental Microbiology* 59:3393–3399.
- 693 20. Suttle CA, Chan AM. 1994. Dynamics and distribution of cyanophages and their effect on  
694 marine *Synechococcus* spp. *Applied and Environmental Microbiology* 60:3167–3174.
- 695 21. Marston MF, Taylor S, Sme N, Parsons RJ, Noyes TJE, Martiny JBH. 2013. Marine  
696 cyanophages exhibit local and regional biogeography. *Environmental Microbiology*  
697 15:1452–1463.
- 698 22. Sandaa R-A, E. Storesund J, Olesin E, Lund Paulsen M, Larsen A, Bratbak G, Ray J. 2018.  
699 Seasonality drives microbial community structure, shaping both eukaryotic and  
700 prokaryotic host–viral relationships in an Arctic marine ecosystem. *Viruses* 10:715.
- 701 23. Clasen J, Hanson C, Ibrahim Y, Weihe C, Marston M, Martiny J. 2013. Diversity and  
702 temporal dynamics of Southern California coastal marine cyanophage isolates. *Aquatic*  
703 *Microbial Ecology* 69:17–31.
- 704 24. Middelboe M, Hagström A, Blackburn N, Sinn B, Fischer U, Borch NH, Pinhassi J, Simu K,  
705 Lorenz MG. 2001. Effects of bacteriophages on the population dynamics of four strains of  
706 pelagic marine bacteria. *Microbial Ecology* 42:395–406.

- 707 25. Bouvier T, Giorgio PA del. 2007. Key role of selective viral-induced mortality in  
708 determining marine bacterial community composition. *Environmental Microbiology*  
709 9:287–297.
- 710 26. Marston MF, Pierciey FJ, Shepard A, Gearin G, Qi J, Yandava C, Schuster SC, Henn MR,  
711 Martiny JBH. 2012. Rapid diversification of coevolving marine *Synechococcus* and a virus.  
712 *Proceedings of the National Academy of Sciences* 109:4544–4549.
- 713 27. Hewson I, Vargo GA, Fuhrman JA. 2003. Bacterial diversity in shallow oligotrophic  
714 marine benthos and overlying waters: Effects of virus infection, containment, and nutrient  
715 enrichment. *Microbial Ecology* 46:322–336.
- 716 28. Thingstad TF. 2000. Elements of a theory for the mechanisms controlling abundance,  
717 diversity, and biogeochemical role of lytic bacterial viruses in aquatic systems. *Limnology*  
718 *and Oceanography* 45:1320–1328.
- 719 29. Thingstad TF, Pree B, Giske J, Våge S. 2015. What difference does it make if viruses are  
720 strain-, rather than species-specific? *Frontiers in Microbiology* 6:320.
- 721 30. Xue C, Goldenfeld N. 2017. Coevolution maintains diversity in the stochastic “Kill the  
722 Winner” model. *Physical Review Letters* 119:268101.
- 723 31. Rodriguez-Brito B, Li L, Wegley L, Furlan M, Angly F, Breitbart M, Buchanan J, Desnues  
724 C, Dinsdale E, Edwards R, Felts B, Haynes M, Liu H, Lipson D, Mahaffy J, Martin-Cuadrado  
725 AB, Mira A, Nulton J, Pašić L, Rayhawk S, Rodriguez-Mueller J, Rodriguez-Valera F, Salamon  
726 P, Srinagesh S, Thingstad TF, Tran T, Thurber RV, Willner D, Youle M, Rohwer F. 2010. Viral

- 727 and microbial community dynamics in four aquatic environments. *The ISME Journal* 4:739–  
728 751.
- 729 32. Needham DM, Sachdeva R, Fuhrman JA. 2017. Ecological dynamics and co-occurrence  
730 among marine phytoplankton, bacteria and myoviruses shows microdiversity matters. *The*  
731 *ISME Journal* 11:1614–1629.
- 732 33. Arkhipova K, Skvortsov T, Quinn JP, McGrath JW, Allen CC, Dutilh BE, McElarney Y,  
733 Kulakov LA. 2018. Temporal dynamics of uncultured viruses: A new dimension in viral  
734 diversity. *The ISME Journal* 12:199–211.
- 735 34. Winter C, Bouvier T, Weinbauer MG, Thingstad TF. 2010. Trade-offs between  
736 competition and defense specialists among unicellular planktonic organisms: The “Killing  
737 the Winner” hypothesis revisited. *Microbiology and Molecular Biology Reviews* 74:42–57.
- 738 35. Goldsmith DB, Parsons RJ, Beyene D, Salamon P, Breitbart M. 2015. Deep sequencing of  
739 the viral *phoH* gene reveals temporal variation, depth-specific composition, and persistent  
740 dominance of the same viral *phoH* genes in the Sargasso Sea. *PeerJ* 3:e997.
- 741 36. Harvey P, Purvis A. 1991. Comparative methods for explaining adaptations. *Nature*  
742 351:619–624.
- 743 37. Srivastava DS, Cadotte MW, MacDonald AAM, Marushia RG, Mirotchnick N. 2012.  
744 Phylogenetic diversity and the functioning of ecosystems. *Ecology Letters* 15:637–648.
- 745 38. Horner-Devine MC, Bohannan BJ. 2006. Phylogenetic clustering and overdispersion in  
746 bacterial communities. *Ecology* 87:S100–S108.

- 747 39. Lennon JT, Aanderud ZT, Lehmkuhl BK, Schoolmaster Jr DR. 2012. Mapping the niche  
748 space of soil microorganisms using taxonomy and traits. *Ecology* 93:1867–1879.
- 749 40. Chow C-ET, Kim DY, Sachdeva R, Caron DA, Fuhrman JA. 2014. Top-down controls on  
750 bacterial community structure: Microbial network analysis of bacteria, T4-like viruses and  
751 protists. *The ISME Journal* 8:816–829.
- 752 41. Breitbart M, Rohwer F. 2005. Here a virus, there a virus, everywhere the same virus?  
753 *Trends in Microbiology* 13:278–284.
- 754 42. Filée J, Tétart F, Suttle CA, Krisch HM. 2005. Marine T4-type bacteriophages, a  
755 ubiquitous component of the dark matter of the biosphere. *Proceedings of the National*  
756 *Academy of Sciences* 102:12471–12476.
- 757 43. Culley AI, Steward GF. 2007. New genera of RNA viruses in subtropical seawater,  
758 inferred from polymerase gene sequences. *Applied and Environmental Microbiology*  
759 73:5937–5944.
- 760 44. Tomaru Y. 2015. Marine diatom viruses and their hosts: Resistance mechanisms and  
761 population dynamics. *Perspectives in Phycology* 2:69–81.
- 762 45. Culley AI, Lang A, Suttle CA. 2003. High diversity of unknown picorna-like viruses in the  
763 sea. *Nature* 424:1054–1057.
- 764 46. Culley AI, Lang A, Suttle CA. 2006. Metagenomic analysis of coastal RNA virus  
765 communities. *Science* 312:1795–1798.

- 766 47. Culley AI, Mueller JA, Belcaid M, Wood-Charlson EM, Poisson G, Steward GF. 2014. The  
767 characterization of RNA viruses in tropical seawater using targeted PCR and metagenomics.  
768 *mBio* 5:e01210–14.
- 769 48. Urayama S-i, Takaki Y, Nishi S, Yoshida-Takashima Y, Deguchi S, Takai K, Nunoura T.  
770 2018. Unveiling the RNA virosphere associated with marine microorganisms. *Molecular*  
771 *Ecology Resources* 18:1444–1455.
- 772 49. Miranda JA, Culley AI, Schvarcz CR, Steward GF. 2016. RNA viruses as major  
773 contributors to Antarctic virioplankton: RNA viruses in the Antarctic. *Environmental*  
774 *Microbiology* 18:3714–3727.
- 775 50. Allen LZ, McCrow JP, Ininbergs K, Dupont CL, Badger JH, Hoffman JM, Ekman M, Allen  
776 AE, Bergman B, Venter JC. 2017. The Baltic Sea Virome: Diversity and Transcriptional  
777 Activity of DNA and RNA Viruses. *MSystems* 2:e00125–16.
- 778 51. Hewson I, Bistolas KS, Button JB, Jackson EW. 2018. Occurrence and seasonal dynamics  
779 of RNA viral genotypes in three contrasting temperate lakes. *PloS ONE* 13:e0194419.
- 780 52. Labbé M, Raymond F, Lévesque A, Thaler M, Mohit V, Audet M, Corbeil J, Culley A. 2018.  
781 Communities of phytoplankton viruses across the transition zone of the St. Lawrence  
782 estuary. *Viruses* 10:672.
- 783 53. Suttle CA, Chan AM, Cottrell MT. 1991. Use of ultrafiltration to isolate viruses from  
784 seawater which are pathogens of marine phytoplankton. *Applied and Environmental*  
785 *Microbiology* 57:721–726.

- 786 54. Parsons T, Maita Y, Lalli C. 1984. A manual of chemical and biological methods for  
787 seawater analysis. Pergamon Press, New York.
- 788 55. Brussaard CPD. 2004. Optimization of procedures for counting viruses by flow  
789 cytometry. *Applied and Environmental Microbiology* 70:1506–1513.
- 790 56. Short SM, Suttle CA. 2003. Temporal dynamics of natural communities of marine algal  
791 viruses and eukaryotes. *Aquatic Microbial Ecology* 32:107–119.
- 792 57. Diez B, Pedros-Alio C, Marsh TL, Massana R. 2001. Application of denaturing gradient  
793 gel electrophoresis (DGGE) to study the diversity of marine picoeukaryotic assemblages  
794 and comparison of DGGE with other molecular techniques. *Applied and Environmental*  
795 *Microbiology* 67:2942–2951.
- 796 58. Baker G, Smith J, Cowan D. 2003. Review and re-analysis of domain-specific 16S  
797 primers. *Journal of Microbiological Methods* 55:541–555.
- 798 59. Muyzer G, Teske A, Wirsen CO, Jannasch HW. 1995. Phylogenetic relationships of  
799 *Thiomicrospira* species and their identification in deep-sea hydrothermal vent samples by  
800 denaturing gradient gel electrophoresis of 16S rDNA fragments. *Archives of Microbiology*  
801 164:165–172.
- 802 60. Bolger AM, Lohse M, Usadel B. 2014. Trimmomatic a flexible trimmer for Illumina  
803 sequence data. *Bioinformatics* 30:2114–2120.
- 804 61. Gordon A. 2014. *Fastx\_toolkit*.

- 805 62. Zhang J, Kobert K, Flouri T, Stamatakis A. 2014. PEAR: A fast and accurate Illumina  
806 Paired-End reAd mergeR. *Bioinformatics* 30:614–620.
- 807 63. Quast C, Pruesse E, Yilmaz P, Gerken J, Schweer T, Yarza P, Peplies J, Glockner FO. 2013.  
808 The SILVA ribosomal RNA gene database project: Improved data processing and web-based  
809 tools. *Nucleic Acids Research* 41:D590–D596.
- 810 64. Schloss PD, Westcott SL, Ryabin T, Hall JR, Hartmann M, Hollister EB, Lesniewski RA,  
811 Oakley BB, Parks DH, Robinson CJ, Sahl JW, Stres B, Thallinger GG, Van Horn DJ, Weber CF.  
812 2009. Introducing mothur: Open-source, platform-independent, community-supported  
813 software for describing and comparing microbial communities. *Applied and Environmental*  
814 *Microbiology* 75:7537–7541.
- 815 65. Edgar RC. 2010. Search and clustering orders of magnitude faster than BLAST.  
816 *Bioinformatics* 26:2460–2461.
- 817 66. Rho M, Tang H, Ye Y. 2010. FragGeneScan predicting genes in short and error-prone  
818 reads. *Nucleic Acids Research* 38:e191–e191.
- 819 67. Lavigne R, Darius P, Summer EJ, Seto D, Mahadevan P, Nilsson AS, Ackermann HW,  
820 Kropinski AM. 2009. Classification of Myoviridae bacteriophages using protein sequence  
821 similarity. *BMC Microbiology* 9:224.
- 822 68. Hou W, Wang S, Briggs BR, Li G, Xie W, Dong H. 2018. High diversity of myocyanophage  
823 in various aquatic environments revealed by high-throughput sequencing of major capsid  
824 protein gene with a new set of primers. *Frontiers in Microbiology* 9:887.



- 825 69. Buerger P, Weynberg K, Wood-Charlson E, Sato Y, Willis B, Oppen M van. 2019. Novel  
826 T4 bacteriophages associated with black band disease in corals: Bacteriophages in black  
827 band disease. *Environmental Microbiology* doi:10.1111/1462-2920.14432.
- 828 70. Gustavsen JA, Winget DM, Tian X, Suttle CA. 2014. High temporal and spatial diversity in  
829 marine RNA viruses implies that they have an important role in mortality and structuring  
830 plankton communities. *Frontiers in Microbiology* 5:703.
- 831 71. Montalvo-Proano J, Buerger P, Weynberg KD, Oppen MJH van. 2017. A PCR-based assay  
832 targeting the major capsid protein gene of a dinorna-like ssRNA virus that infects coral  
833 photosymbionts. *Frontiers in Microbiology* 8:1665.
- 834 72. Oksanen J, Blanchet FG, Kindt R, Legendre P, Minchin PR, O'Hara RB, Simpson GL,  
835 Solymos P, Stevens MHH, Wagner H. 2015. *Vegan: Community Ecology Package*.
- 836 73. Hijmans RJ. 2015. *Geosphere: Spherical Trigonometry*.
- 837 74. Johnson LS, Eddy SR, Portugaly E. 2010. Hidden Markov model speed heuristic and  
838 iterative HMM search procedure. *BMC Bioinformatics* 11:431.
- 839 75. Sievers F, Wilm A, Dineen D, Gibson TJ, Karplus K, Li W, Lopez R, McWilliam H, Remmert  
840 M, Soding J, Thompson JD, Higgins DG. 2014. Fast, scalable generation of high-quality  
841 protein multiple sequence alignments using Clustal Omega. *Molecular Systems Biology*  
842 7:539–539.
- 843 76. Jia Z, Ishihara R, Nakajima Y, Asakawa S, Kimura M. 2007. Molecular characterization of  
844 T4-type bacteriophages in a rice field. *Environmental Microbiology* 9:1091–1096.

- 845 77. López-Bueno A, Tamames J, Velázquez D, Moya A, Quesada A, Alcamí A. 2009. High  
846 diversity of the viral community from an Antarctic lake. *Science* 326:858–861.
- 847 78. Comeau AM, Arbiol C, Krisch HM. 2010. Gene network visualization and quantitative  
848 synteny analysis of more than 300 marine T4-like phage scaffolds from the GOS  
849 metagenome. *Molecular Biology and Evolution* 27:1935–1944.
- 850 79. Liu J, Wang G, Wang Q, Liu J, Jin J, Liu X. 2012. Phylogenetic diversity and assemblage of  
851 major capsid genes (*g23*) of T4-type bacteriophages in paddy field soils during rice  
852 growth season in Northeast China. *Soil Science and Plant Nutrition* 58:435–444.
- 853 80. Bellas CM, Anesio AM. 2013. High diversity and potential origins of T4-type  
854 bacteriophages on the surface of Arctic glaciers. *Extremophiles* 17:861–870.
- 855 81. Butina TV, Belykh OI, Potapov SA, Sorokovikova EG. 2013. Diversity of the major capsid  
856 genes (*g23*) of T4-like bacteriophages in the eutrophic Lake Kotokel in East Siberia, Russia.  
857 *Archives of Microbiology* 195:513–520.
- 858 82. Larsson A. 2014. AliView: A fast and lightweight alignment viewer and editor for large  
859 datasets. *Bioinformatics* 30:3276–3278.
- 860 83. Capella-Gutierrez S, Silla-Martinez JM, Gabaldon T. 2009. trimAl: A tool for automated  
861 alignment trimming in large-scale phylogenetic analyses. *Bioinformatics* 25:1972–1973.
- 862 84. Price MN, Dehal PS, Arkin AP. 2010. FastTree 2—approximately maximum-likelihood  
863 trees for large alignments. *PLoS ONE* 5:e9490.

- 864 85. Stamatakis A. 2014. RAxML version 8: A tool for phylogenetic analysis and post-analysis  
865 of large phylogenies. *Bioinformatics* 30:1312–1313.
- 866 86. Darriba D, Taboada GL, Doallo R, Bangor D. 2011. ProtTest 3: Fast selection of best-fit  
867 models of protein evolution. *Bioinformatics* 27:1164–1165.
- 868 87. Faith DP. 1992. Conservation evaluation and phylogenetic diversity. *Biological*  
869 *Conservation* 61:1–10.
- 870 88. Kembel SW, Cowan PD, Helmus MR, Cornwell WK, Morlon H, Ackerly DD, Blomberg SP,  
871 Webb CO. 2010. Picante: R tools for integrating phylogenies and ecology. *Bioinformatics*  
872 26:1463–1464.
- 873 89. Yu G, Smith D, Zhu H, Guan Y, Lam TT-Y. 2017. ggtree: An R package for visualization  
874 and annotation of phylogenetic trees with their covariates and other associated data.  
875 *Methods in Ecology and Evolution* 8:28–36.
- 876 90. R Core Team. 2014. R: A language and environment for statistical computing. R  
877 Foundation for Statistical Computing, Vienna, Austria.
- 878 91. Harrison PJ, Fulton JD, Taylor FJR, Parsons TR. 1983. Review of the biological  
879 oceanography of the Strait of Georgia: Pelagic environment. *Canadian Journal of Fisheries*  
880 *and Aquatic Sciences* 40:1064–1094.
- 881 92. Allen S, Wolfe M. 2013. Hindcast of the timing of the spring phytoplankton bloom in the  
882 Strait of Georgia, 1968-2010. *Progress in Oceanography* 115:6–13.

- 883 93. Velthuis AJW te. 2014. Common and unique features of viral RNA-dependent  
884 polymerases. *Cellular and Molecular Life Sciences* 71:4403–4420.
- 885 94. Suttle CA. 2007. Marine viruses - major players in the global ecosystem. *Nature Reviews*  
886 *Microbiology* 5:801–812.
- 887 95. Chénard C, Suttle CA. 2008. Phylogenetic diversity of sequences of cyanophage  
888 photosynthetic gene *psba* in marine and freshwaters. *Applied and Environmental*  
889 *Microbiology* 74:5317–5324.
- 890 96. Finke J, Winget D, Chan A, Suttle C. 2017. Variation in the genetic repertoire of viruses  
891 infecting *Micromonas pusilla* reflects horizontal gene transfer and links to their  
892 environmental distribution. *Viruses* 9:116.
- 893 97. Kellogg CA, Paul JH. 2002. Degree of ultraviolet radiation damage and repair capabilities  
894 are related to G+ C content in marine vibriophages. *Aquatic microbial ecology* 27:13–20.
- 895 98. Bragg JG, Chisholm SW. 2008. Modeling the fitness consequences of a cyanophage-  
896 encoded photosynthesis gene. *PLoS ONE* 3:e3550.
- 897 99. Moniruzzaman M, Wurch LL, Alexander H, Dyhrman ST, Gobler CJ, Wilhelm SW. 2017.  
898 Virus-host relationships of marine single-celled eukaryotes resolved from  
899 metatranscriptomics. *Nature Communications* 8:16054.
- 900 100. Short SM, Short CM. 2009. Quantitative PCR reveals transient and persistent algal  
901 viruses in Lake Ontario, Canada. *Environmental Microbiology* 11:2639–2648.

- 902 101. Rozon RM, Short SM. 2013. Complex seasonality observed amongst diverse  
903 phytoplankton viruses in the Bay of Quinte, an embayment of Lake Ontario. *Freshwater*  
904 *Biology* 58:2648–2663.
- 905 102. Needham DM, Chow C-ET, Cram JA, Sachdeva R, Parada A, Fuhrman JA. 2013. Short-  
906 term observations of marine bacterial and viral communities: Patterns, connections and  
907 resilience. *The ISME Journal* 7:1274–1285.
- 908 103. Holmes EC. 2010. The RNA Virus Quasispecies: Fact or Fiction? *Journal of Molecular*  
909 *Biology* 400:271–273.
- 910 104. Domingo E, Sheldon J, Perales C. 2012. Viral quasispecies evolution. *Microbiology and*  
911 *Molecular Biology Reviews* 76:159–216.
- 912 105. Milo R, Jorgensen P, Moran U, Weber G, Springer M. 2010. BioNumbers the database of  
913 key numbers in molecular and cell biology. *Nucleic Acids Research* 38:D750–D753.
- 914 106. Weitz JS, Hartman H, Levin SA. 2005. Coevolutionary arms races between bacteria and  
915 bacteriophage. *Proceedings of the National Academy of Sciences* 102:9535–9540.
- 916 107. Dutilh BE, Cassman N, McNair K, Sanchez SE, Silva GGZ, Boling L, Barr JJ, Speth DR,  
917 Seguritan V, Aziz RK, Felts B, Dinsdale EA, Mokili JL, Edwards RA. 2014. A highly abundant  
918 bacteriophage discovered in the unknown sequences of human faecal metagenomes.  
919 *Nature Communications* 5:4498.
- 920 108. Renzette N, Pokalyuk C, Gibson L, Bhattacharjee B, Schleiss MR, Hamprecht K,  
921 Yamamoto AY, Mussi-Pinhata MM, Britt WJ, Jensen JD, Kowalik TF. 2015. Limits and

- 922 patterns of cytomegalovirus genomic diversity in humans. Proceedings of the National  
923 Academy of Sciences 112:E4120–E4128.
- 924 109. López-Bueno A, Rastrojo A, Peiró R, Arenas M, Alcamí A. 2015. Ecological connectivity  
925 shapes quasispecies structure of RNA viruses in an Antarctic lake. Molecular Ecology  
926 24:4812–4825.
- 927 110. Storesund JE, Erga SR, Ray JL, Thingstad TF, Sandaa R-A. 2015. Top-down and bottom-  
928 up control on bacterial diversity in a western Norwegian deep-silled fjord. FEMS  
929 Microbiology Ecology 91:fiv076.
- 930 111. Tarutani K, Nagasaki K, Yamaguchi M. 2000. Viral impacts on total abundance and  
931 clonal composition of the harmful bloom-forming phytoplankton *Heterosigma akashiwo*.  
932 Applied and Environmental Microbiology 66:4916–4920.
- 933 112. Nagasaki K, Yamaguchi M. 1997. Isolation of a virus infectious to the harmful bloom  
934 causing microalga *Heterosigma akashiwo* (Raphidophyceae). Aquatic Microbial Ecology  
935 13:135–140.
- 936 113. Harvey EL, Menden-Deuer S. 2012. Predator-induced fleeing behaviors in  
937 phytoplankton: A new mechanism for harmful algal bloom formation? PLoS ONE 7:e46438.
- 938 114. Schroeder DC, Oke J, Hall M, Malin G, Wilson WH. 2003. Virus succession observed  
939 during an *Emiliania huxleyi* bloom. Applied and Environmental Microbiology 69:2484–  
940 2490.

- 941 115. Emerson JB, Thomas BC, Andrade K, Heidelberg KB, Banfield JF. 2013. New  
942 approaches indicate constant viral diversity despite shifts in assemblage structure in an  
943 Australian hypersaline lake. *Applied and Environmental Microbiology* 79:6755–6764.
- 944 116. Short CM, Rusanova O, Short SM. 2010. Quantification of virus genes provides  
945 evidence for seed-bank populations of phycodnaviruses in Lake Ontario, Canada. *The ISME*  
946 *Journal* 5:810–821.
- 947 117. Zhong X, Jacquet S. 2014. Differing assemblage composition and dynamics in T4-like  
948 myophages of two neighbouring sub-alpine lakes. *Freshwater Biology* 59:1577–1595.
- 949 118. Brum JR, Ignacio-Espinoza JC, Roux S, Doucier G, Acinas SG, Alberti A, Chaffron S,  
950 Cruaud C, Vargas C de, Gasol JM, Gorsky G, Gregory AC, Guidi L, Hingamp P, Iudicone D, Not  
951 F, Ogata H, Pesant S, Poulos BT, Schwenck SM, Speich S, Dimier C, Kandels-Lewis S, Picheral  
952 M, Searson S, Bork P, Bowler C, Sunagawa S, Wincker P, Karsenti E, Sullivan MB. 2015.  
953 Patterns and ecological drivers of ocean viral communities. *Science* 348:1261498.
- 954 119. Koeppel AF, Wu M. 2013. Species matter: The role of competition in the assembly of  
955 congeneric bacteria. *The ISME Journal* 8:531–540.
- 956 120. Lee CK, Herbold CW, Polson SW, Wommack KE, Williamson SJ, McDonald IR, Cary SC.  
957 2012. Groundtruthing next-gen sequencing for microbial ecology—biases and errors in  
958 community structure estimates from PCR amplicon pyrosequencing. *PLoS ONE* 7:e44224.
- 959 121. Pinto AJ, Raskin L. 2012. PCR biases distort bacterial and archaeal community  
960 structure in pyrosequencing datasets. *PLoS ONE* 7:e43093.

961 122. Shade A, Jones SE, Caporaso JG, Handelsman J, Knight R, Fierer N, Gilbert JA. 2014.

962 Conditionally rare taxa disproportionately contribute to temporal changes in microbial

963 diversity. *mBio* 5:e01371–14.

964 123. Qiu X, Wu L, Huang H, McDonel PE, Palumbo AV, Tiedje JM, Zhou J. 2001. Evaluation of

965 PCR-Generated chimeras, mutations, and heteroduplexes with 16S rRNA gene-based

966 cloning. *Applied and Environmental Microbiology* 67:880–887.

967



968 **Tables**

969 Table 1: PCR parameters used in this study.

| <b>Marker gene</b>   | <b>Target</b>           | <b>Primer names</b>   | <b>PCR initial</b> | <b>PCR denaturation</b> | <b>Annealing temperature</b>                  | <b>Extension</b> | <b>Cycles</b> | <b>Final extension</b> | <b>Reference</b> |
|----------------------|-------------------------|-----------------------|--------------------|-------------------------|-----------------------------------------------|------------------|---------------|------------------------|------------------|
| <b>gp23</b>          | T4-like virus           | MZIA1bis and MZIA6    | 94°C for 90 s      | 94°C for 45 s           | 50°C                                          | 72°C for 45 s    | 35            | 5 min at 72°C          | 42               |
| <b>RdRp</b>          | Marnavirus-like viruses | MPL-2F and MPL-2R     | 94°C for 75 s      | 94°C for 45 s           | 43°C                                          | 72°C for 60 s    | 40            | 9 min at 72°C          | 43               |
| <b>18S rRNA gene</b> | Eukaryotes              | Euk1209f and Uni1392r | 94°C for 75 s      | 94°C for 1 min          | 65°C touchdown for 10 cycles followed by 55°C | 72°C for 60 s    | 10 + 20       | 9 min at 72°C          | 57               |
| <b>16S rRNA gene</b> | Bacteria                | 341F and 907R         | 94°C for 75 s      | 94°C for 1 min          | 64°C, 12cycles followed by 54°C               | 72°C for 60 s    | 12 + 25       | 10 min at 72°C         | 59 ; 58          |

970

971 **Figures and Figure Legends**

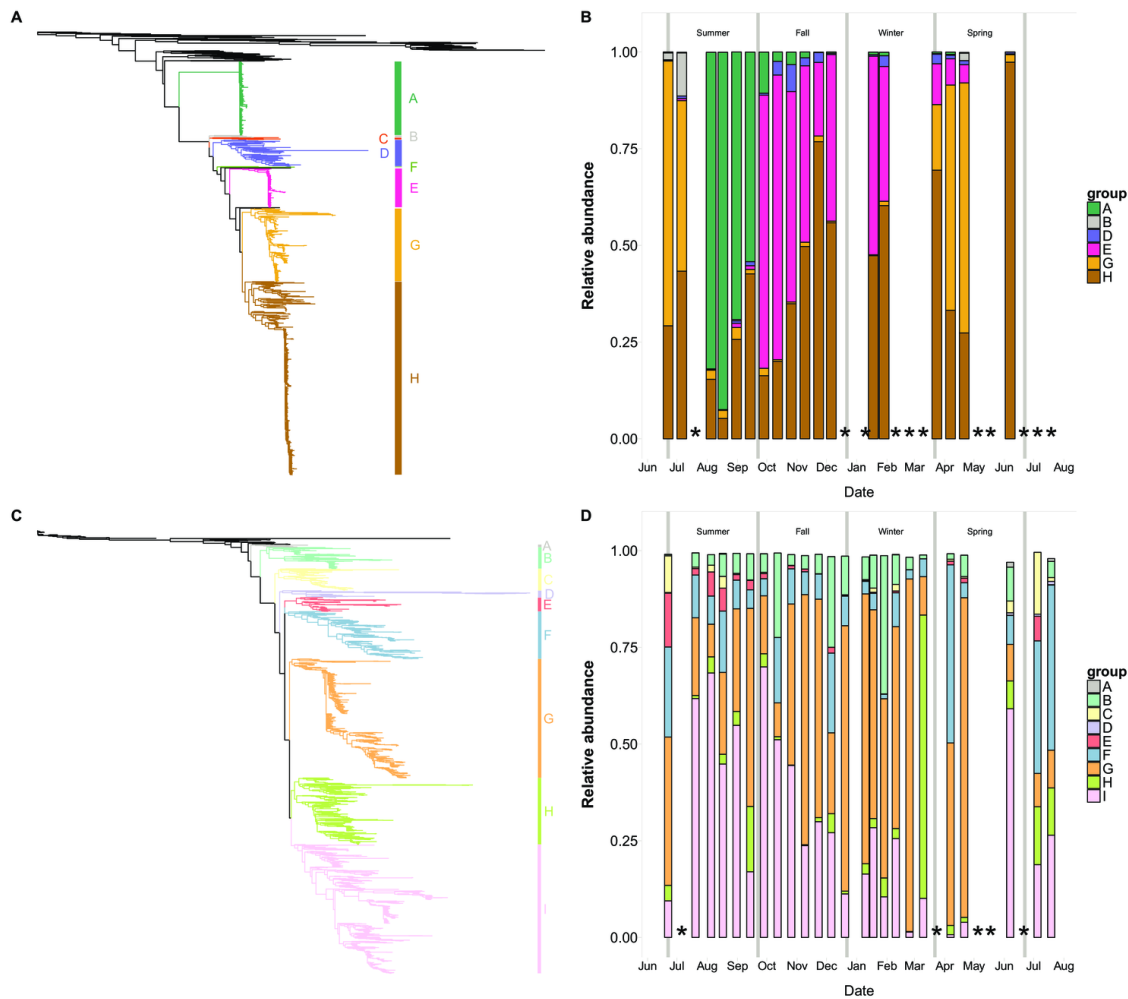

972

973 Fig. 1: Maximum likelihood RAxML phylogenetic trees and barplots of closely-related  
974 phylogenetic groups of OTUs. A) Tree of marnavirus-like virus *RdRp* sequences including  
975 reference sequences and OTUs generated in this study. Outgroup is virus Equine rhinitis B virus  
976 (*Picornaviridae*). B) Barplot of the relative abundances of marnavirus-like virus phylogenetic  
977 groups over time. C) Tree of T4-like virus major capsid protein sequences including reference  
978 sequences and OTUs generated in this study. Outgroup is Enterobacteria phage T4. D) Barplot  
979 of the relative abundances of T4-like virus phylogenetic groups from over time. Grey vertical  
980 lines indicate seasonal boundaries. X's indicate missing or removed samples. More detailed  
981 phylogenetic trees are available in Supplemental figures.

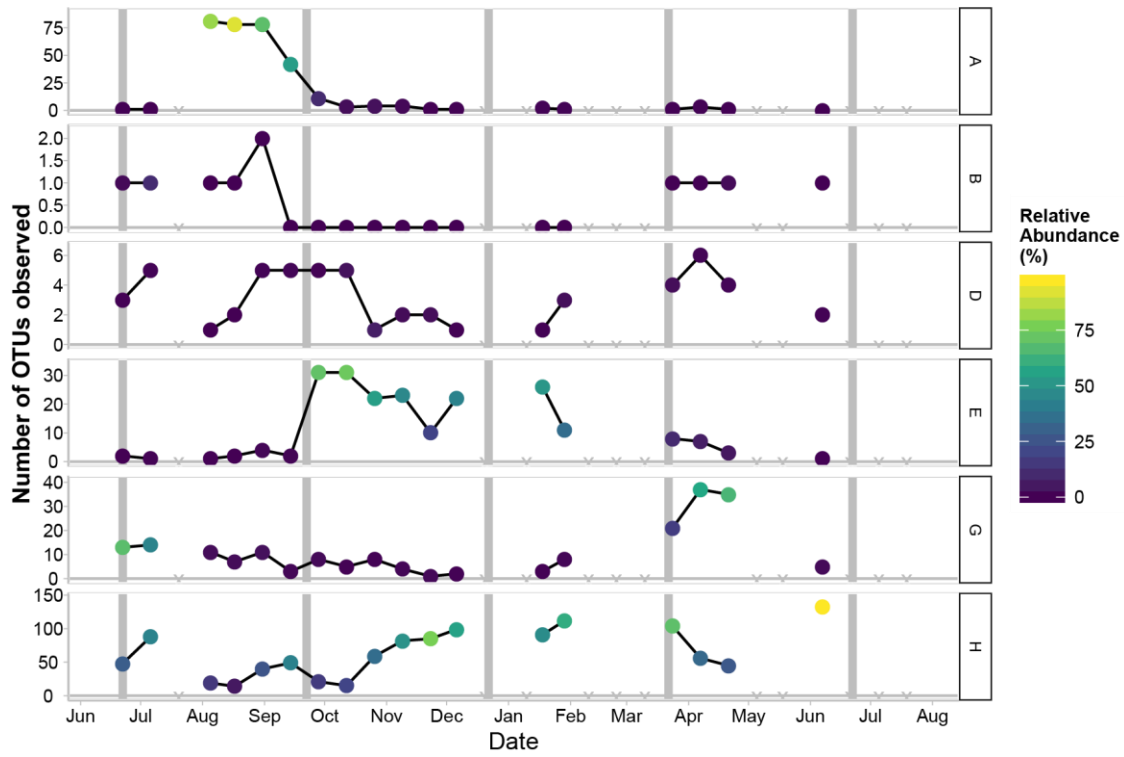

982

983 *Fig. 2: Richness of observed marnavirus-like viral OTUs (95% amino-acid similarity). X's*  
984 *indicate missing or removed samples.*

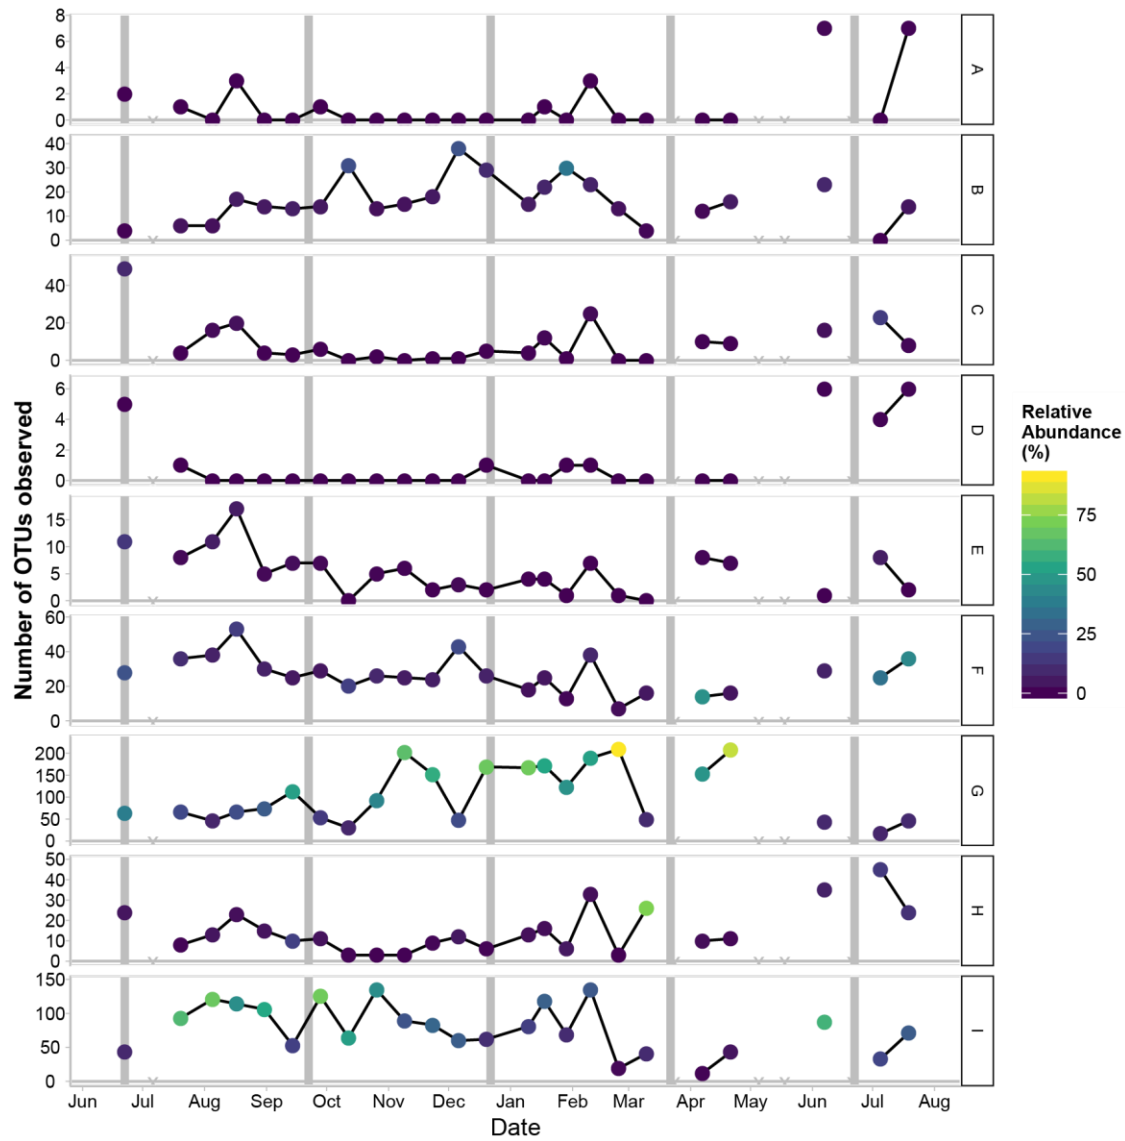

985

986 *Fig. 3: Richness of observed T4-like virus OTUs (95% amino-acid similarity). X's indicate*  
987 *missing or removed samples.*

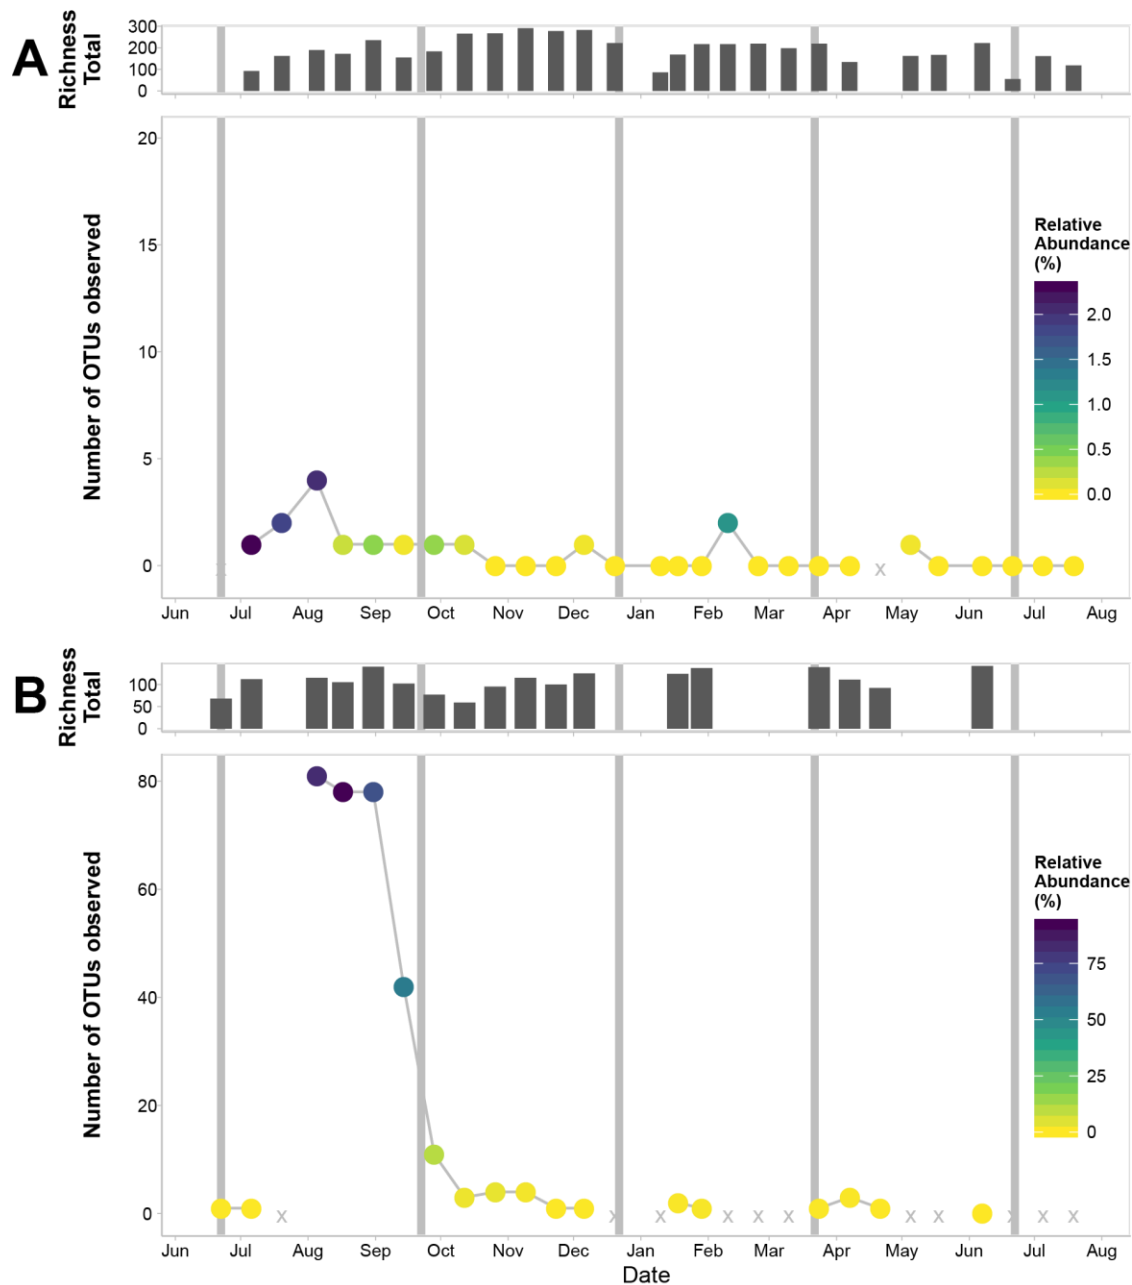

988

989 *Fig. 4: Marine marnavirus-like viral Group A compared to OTUs classified as raphidophytes*  
990 *over time. A) Relative abundance of OTUs (97%) classified as raphidophytic OTUs over time.*  
991 *Richness of all 18S OTUs at each time point is plotted above the richness of the raphidophytes..*  
992 *B) Relative abundance of marnavirus-like virus Group A OTUs (95% amino acid) over time.*  
993 *Richness of all marnavirus-like virus OTUs is plotted above the richness of the Group A OTUs.*  
994 *Grey vertical lines indicate boundaries between seasons. X's indicate missing or removed*  
995 *samples.*

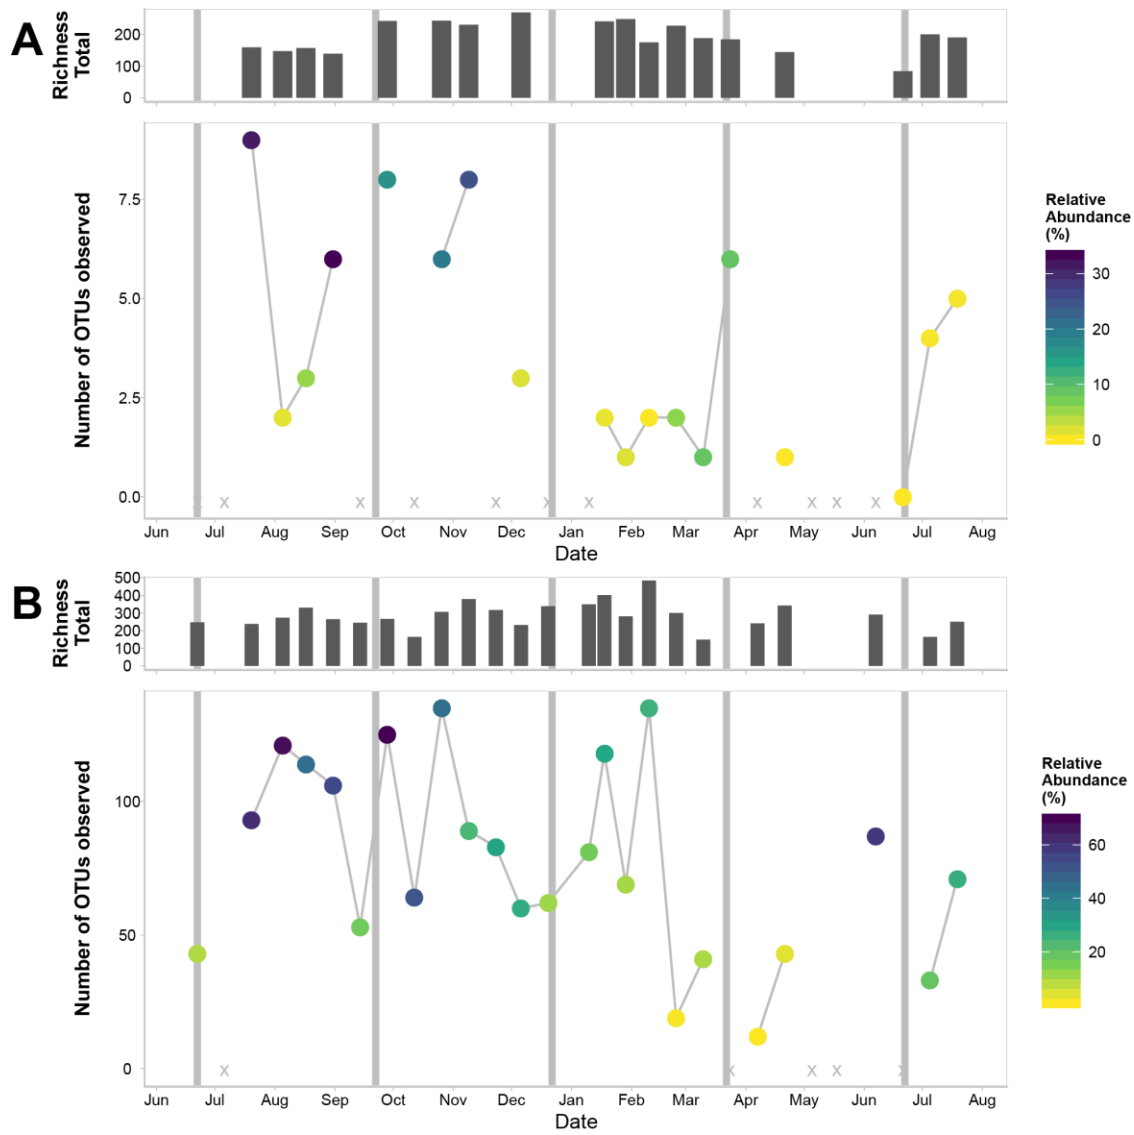

996

997 *Fig. 5: T4-like virus Group I compared to bacterial OTUs classified as cyanobacteria over time.*

998 *A) Relative abundance of bacterial OTUs (97%) classified as cyanobacterial OTUs over time.*

999 *Richness of all 16S OTUs at each time point is plotted above the richness of the cyanobacteria.*

1000 *B) Relative abundance of T4-like virus Group I OTUs (95% amino acid) over time. Richness of*

1001 *all T4-like virus OTUs is plotted above the richness of the Group I OTUs. Grey vertical lines*

1002 *indicate boundaries between seasons. X's indicate missing or removed samples.*

1003

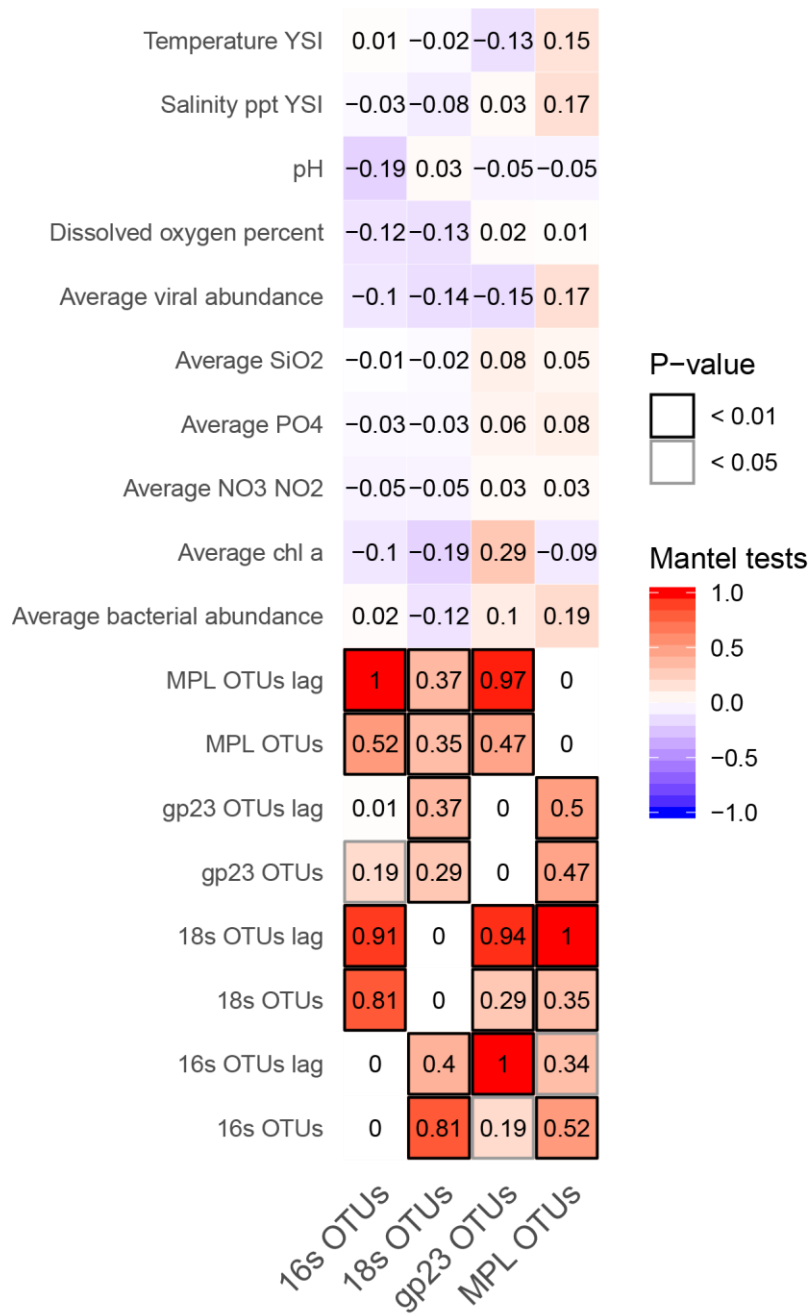

1004

1005 *Fig. 6: Mantel tests among community similarity matrices and distance matrices of*  
 1006 *environmental data.*

1007
